## Deficits in integrative NMDA receptors caused by *Grin1* disruption can be rescued in adulthood

S. Venkatesan<sup>1\*</sup>, M.A. Binko<sup>1\*#</sup>, C.A. Mielnik<sup>2</sup>, A.J. Ramsey<sup>1,2</sup>, E.K. Lambe<sup>1,3,4</sup>

<sup>1</sup>Department of Physiology, University of Toronto, ON, Canada

<sup>2</sup>Department of Pharmacology and Toxicology, University of Toronto, ON, Canada

<sup>3</sup>Department of OBGYN, University of Toronto, ON, Canada

<sup>4</sup>Department of Psychiatry, University of Toronto, ON, Canada

\* Equally-contributing co-first authors

# Current institution: University of Pittsburgh Medical Center

### Corresponding author:

E. K. Lambe, Ph.D.

Department of Physiology

Temerty Faculty of Medicine

University of Toronto

1 King's College Circle

Toronto ON M5S 1A8

Phone: 416-946-0910

Email: [evelyn.lambe@utoronto.ca](mailto:evelyn.lambe@utoronto.ca)

Word count: 3945/4000

Figures: 5

Supplemental Materials: Supplemental Tables S1 and S2, Supplemental Methods

### Acknowledgements:

This work was generously supported by the Canadian Institutes of Health Research (EKL, PJT-178372, EKL MOP-89825; AJR MOP-119298), Simons Foundation for Autism Research (AJR), CureGRIN Research Foundation (AJR), the Canada Research Chairs program (EKL, Canada Research Chair in Developmental Cortical Physiology), a Pathway Award from the University of Toronto Faculty of Medicine (EKL), as well as multiple fellowships from the Ontario Graduate Scholarship programs (SV, MAB, CAM). We gratefully thank Wendy Horsfall, Duong Chu, Janice McNabb, and Marija Milenkovic for expert technical assistance.

Author contributions: designed study (MAB, SV, EKL), conducted experiments and analyzed data (MAB, SV), contributed tools (AJR), wrote first draft of paper (MAB, SV), wrote and revised paper (MAB, SV, CAM, AJR, EKL).

Conflict statement: The authors declare no conflicts of interest.

1 **Abstract** (229/250)

2 Glutamatergic NMDA receptors (NMDAR) are critical for cognitive function, and their  
3 reduced expression leads to intellectual disability. Since subpopulations of NMDARs  
4 exist in distinct subcellular environments, their functioning may be unevenly vulnerable  
5 to genetic disruption. Here, we investigate synaptic and extrasynaptic NMDARs on the  
6 major output neurons of the prefrontal cortex in mice deficient for the obligate NMDAR  
7 subunit encoded by *Grin1* and wild-type littermates. With whole-cell recording in brain  
8 slices, we find that single, low-intensity stimuli elicit surprisingly-similar glutamatergic  
9 synaptic currents in both genotypes. By contrast, clear genotype differences emerge  
10 with manipulations that recruit extrasynaptic NMDARs, including stronger, repetitive, or  
11 pharmacological stimulation. These results reveal a disproportionate functional deficit of  
12 extrasynaptic NMDARs compared to their synaptic counterparts. To probe the  
13 repercussions of this deficit, we examine an NMDAR-dependent phenomenon  
14 considered a building block of cognitive integration, basal dendrite plateau potentials.  
15 Since we find this phenomenon is readily evoked in wild-type but not in *Grin1*-deficient  
16 mice, we ask whether plateau potentials can be restored by an adult intervention to  
17 increase *Grin1* expression. This genetic manipulation, previously shown to restore  
18 cognitive performance in adulthood, successfully rescues electrically-evoked basal  
19 dendrite plateau potentials after a lifetime of NMDAR compromise. Taken together, our  
20 work demonstrates NMDAR subpopulations are not uniformly vulnerable to the genetic  
21 disruption of their obligate subunit. Furthermore, the window for functional rescue of the  
22 more-sensitive integrative NMDARs remains open into adulthood.

23

## 24 **Introduction**

25           Glutamatergic N-methyl-D-aspartate receptors (NMDARs) are increasingly  
26 appreciated for their role in cognitive integration<sup>1-4</sup>. Mutations that reduce expression or  
27 function of NMDARs are a direct cause of intellectual disability<sup>5,6</sup>. Relatively little is  
28 known, however, about whether there is variability across cellular domains in the  
29 functional impact of NMDAR genetic compromise. This is a critical area of exploration  
30 because NMDARs in different subcellular compartments play distinct neurophysiological  
31 roles<sup>2,7,8</sup> and experience distinct regulatory environments that may permit differing  
32 degrees of homeostatic compensation<sup>9-14</sup>. Understanding the relative vulnerability of  
33 NMDAR subpopulations to genetic disruption is essential to appreciate mechanisms of  
34 cognitive compromise and to identify new treatment approaches.

35           NMDARs are high affinity ligand-gated channels that are also voltage-dependent,  
36 requiring both ligand-binding and depolarization to open. If glutamate binds without  
37 sufficient depolarization to relieve Mg<sup>2+</sup> blockade, the NMDAR acts as a 'coincidence-  
38 detector' between synaptic activation and subsequent depolarization. While this concept  
39 has been well explored in the context of synaptic plasticity, it is increasingly appreciated  
40 that glutamate travels beyond the synapse and this spillover increases upon strong or  
41 repeated stimuli<sup>15-17</sup>. Glutamate spillover is the substrate for integrative phenomena  
42 including dendritic plateau potentials, where stimulation of extrasynaptic NMDARs in the  
43 healthy brain allows enhanced cortical output in response to strong, repetitive, or  
44 converging inputs<sup>2,7,18-20</sup>.

45           Here, we investigated *Grin1* knockdown (*Grin1KD*) mice with a profound  
46 deficiency in NMDAR receptor expression and binding<sup>21,22</sup> and severe cognitive deficits  
47<sup>23</sup>. Consistent with previous work in this mouse and in other models of developmental  
48 cognitive disruption<sup>24</sup>, neuronal membrane properties are unaltered. Furthermore, low-  
49 intensity stimuli revealed that neither AMPA receptor (AMPA) nor NMDAR synaptic  
50 currents differed significantly across genotypes. However, a sizable deficit in the  
51 *Grin1KD* NMDAR response was revealed by stronger, repetitive, or pharmacological  
52 stimulation. The magnitude of this functional deficit was consistent with deficits  
53 observed anatomically in previous receptor binding work. To probe the repercussions of  
54 this primarily extrasynaptic deficit in NMDARs, we examined dendritic plateau potentials

55 and found that *Grin1*KD mice are severely impaired in this integrative domain. In the  
56 final experiment, we tested the possibility of restoring cognitively-critical synaptic  
57 integration in adulthood, building on recent work showing that adult intervention to  
58 increase *Grin1* expression achieves meaningful cognitive restoration<sup>23</sup>. We determine  
59 that dendritic plateau potentials can indeed be rescued by adult intervention to increase  
60 *Grin1* expression. Taken together, this work reveals that integrative NMDARs are  
61 disproportionately sensitive to genetic disruption but amenable to restoration upon  
62 intervention in adulthood.

### 63 **Materials and Methods**

64 Animals: All experiments were approved by the University of Toronto Animal Care and  
65 Use Committee and followed Canadian Council on Animal Care guidelines. Mice were  
66 group-housed and kept on a 12-hour light cycle with food and water access *ad libitum*.

67 Mice for the initial experiments were generated from intercross breeding of C57Bl/6J  
68 *Grin1* heterozygotes with 129X1Sv/J *Grin1* heterozygotes, producing an F1 generation  
69 of *Grin1*KD (*Grin1*<sup>neo/neo</sup>) and wild-type (WT) littermate siblings used for experiments  
70 <sup>21,23</sup>. Adult male and female mice were used for experiments (sex-matched and age-  
71 matched; age: 104 ± 5 days), with recordings from 52 WT and *Grin1*KD mice.

72 For the adult genetic rescue experiments, we used an additional 14 WT, *Grin1*KD, and  
73 *Grin1*rescue mice of both sexes. The generation of the line permitting adult rescue with  
74 tamoxifen is described in greater detail<sup>23</sup>. Starting in adulthood at 84 ± 6 days, all three  
75 genotypes of mice for the rescue experiment were treated with tamoxifen chow  
76 (TD.140425, 500 □ mg/kg, Envigo) *ad libitum* for 14 days. Electrophysiology experiments  
77 were conducted upon 38 ± 5 days washout from tamoxifen (sex matched and age-  
78 matched; age: 135 ± 3 days).

79 Electrophysiological Recordings: Prefrontal brain slices were prepared as previously  
80 described<sup>25</sup> and as detailed in **Supplemental Methods**. Layer 5 pyramidal neurons in  
81 the medial prefrontal cortex, including cingulate and prelimbic regions, were visually  
82 identified by their pyramidal shape and prominent apical dendrite using infrared  
83 differential interference contrast microscopy. Unless otherwise indicated, whole-cell patch

84 clamp electrodes contained potassium-gluconate patch solution. All ACSF and pipette  
85 solutions used for the following experiments are listed in **Supplemental Methods**.  
86 Intrinsic membrane properties and excitability were assessed in current-clamp.

87 Evoked excitatory postsynaptic currents: AMPAR-mediated evoked excitatory  
88 postsynaptic currents (eEPSCs) were measured in voltage-clamp at a holding potential  
89 of -75 mV. A bipolar stimulating electrode (FHC) was located in layer 2/3 for apical  
90 dendrite stimulation with pyramidal neurons in layer 5 recorded ~250  $\mu\text{m}$  away from the  
91 electrode. For basal dendrite stimulation, the stimulating electrode was placed in the  
92 basal dendritic field ~100  $\mu\text{m}$  from the soma of the recorded layer 5 pyramidal neuron.  
93 For both apical and basal stimulation paradigms, single pulses of 40  $\mu\text{s}$  duration were  
94 delivered at 0.1 Hz, increasing in 10  $\mu\text{A}$  increments. The AMPAR-mediated eEPSCs  
95 were analyzed as an average of at least 3 traces with Clampfit (Molecular Devices).

96 Isolated NMDA receptor-mediated eEPSCs were measured in voltage-clamp at  
97 a holding potential of +60 mV using specialized patch solution to block voltage-gated  
98 potassium and sodium channels. These recordings were performed in the presence of  
99 modified ACSF (1 mM  $\text{MgSO}_4$ ), AMPAR antagonists CNQX (20  $\mu\text{M}$ ) or NBQX (20  $\mu\text{M}$ ),  
100 and GABA receptor antagonists picrotoxin (PTX, 50  $\mu\text{M}$ ) and CGP52432 (CGP, 1  $\mu\text{M}$ ).  
101 Stimulation in the apical or basal dendritic fields were delivered as above. The NMDA  
102 receptor-mediated eEPSCs were analyzed as an average of 3 traces with Clampfit  
103 (Molecular Devices) and D-APV (50  $\mu\text{M}$ ) was applied to confirm NMDAR responses.

104 Enhancing glutamate spillover: To additionally recruit the extrasynaptic population of  
105 NMDA receptors, a 20 Hz train of mild stimuli was delivered in the apical location.  
106 Glutamate spillover was additionally enhanced with the application of TBOA (30  $\mu\text{M}$ )  
107 and LY341495 (1  $\mu\text{M}$ ) to block glial glutamate uptake and mGluR2/3 presynaptic  
108 autoreceptors respectively<sup>26,27</sup>.

109 Pharmacological stimulation with NMDA application: Total synaptic and extrasynaptic  
110 NMDAR currents were measured by bath application of NMDA (20  $\mu\text{M}$ , 30 s) in a  
111 different subset of brain slices. Voltage-clamp recordings were performed with  
112 potassium-gluconate patch solution in a modified ACSF to reduce magnesium blockade  
113 as neurons were held at -75 mV. The AMPAR antagonist CNQX (20  $\mu\text{M}$ ) was also

114 included. The peak amplitude of the NMDA receptor current was compared to baseline  
115 current using Clampfit. In a subset of experiments, D-APV (50  $\mu$ M) was applied to verify  
116 NMDAR mediation of the inward currents.

117 *NMDAR-dependent dendritic plateau potentials*: Plateau potentials were generated by  
118 stimulation of the basal dendritic field of layer 5 pyramidal neurons, with the stimulating  
119 electrode placed within  $\sim$ 100  $\mu$ m radius of the cell body. Plateau potentials were  
120 recorded in current-clamp at an initial membrane potential of -75 mV. They were  
121 generated with 10 stimuli at 50 Hz at the minimal stimulus intensity to evoke  
122 glutamatergic EPSCs<sup>7,28</sup>. PTX (20  $\mu$ M) and CGP52432 (1  $\mu$ M) were present to block  
123 GABA receptors in combination with AMPAR blockers CNQX (20  $\mu$ M) or NBQX (20  $\mu$ M)  
124 to isolate NMDAR plateau potentials. D-APV (50 $\mu$ M) was applied to confirm NMDAR  
125 dependence of plateau potentials.

126 *Statistics*: Statistical tests were performed in Prism 7 (Graphpad). Data are presented  
127 as mean  $\pm$  SEM. Parametric statistical comparisons between responses from different  
128 groups of mice were determined using two-tailed unpaired *t* tests, and within-cell effects  
129 examined with two-tailed paired *t* tests. Where appropriate, interactions between  
130 genotype and other variables were assessed with two-way ANOVA or repeated-  
131 measure two-way ANOVA with *post hoc* Sidak-corrected *t* tests. Where 3 groups were  
132 treated with tamoxifen, the impact of adult intervention to rescue *Grin1* expression was  
133 assessed with non-parametric Kruskal Wallis test and Dunn's *post hoc* tests due to the  
134 distribution of the data. Within cell pharmacological investigations for this dataset were  
135 therefore compared with a non-parametric paired test.

## 136 **Results**

137 To investigate the differential vulnerability of synaptic and extrasynaptic NMDARs to  
138 genetic disruption, we performed *ex vivo* electrophysiology in major output pyramidal  
139 neurons of prefrontal cortex from mice deficient in the obligate NMDAR subunit  
140 (*Grin1*KD) and their wild-type (WT) littermate controls (**Fig 1A**). We found that neuronal  
141 properties, including resting membrane potential, input resistance, capacitance, spike  
142 amplitude, and rheobase did not differ significantly between the genotypes



143 **(Supplemental Table S1)**. The input-output relationship showed the expected effect of  
144 current ( $F_{3,123} = 307.6$ ;  $P < 0.0001$ ; **Fig 1B,C**), but did not differ significantly between the  
145 genotypes ( $F_{1,41} = 0.4525$ ;  $P = 0.50$ ), nor show an interaction  $F_{3,123} = 1.123$ ;  $P = 0.34$ ).

#### 146 ***Preserved synaptic glutamatergic responses in Grin1KD mice***

147 To test AMPAR synaptic responses from stimulation in the apical dendritic field, we  
148 recorded from layer 5 pyramidal neurons at a holding potential of -75 mV and applied  
149 electrically-evoked stimulation in layer 2/3 (**Fig 1D**). There was no significant difference  
150 between genotypes in the electrical stimulus required to elicit the minimal response ( $t_{27} =$   
151  $0.3$ ;  $P = 0.8$ ), and response amplitudes were similar in both genotypes (**Fig 1E,F**). We  
152 observed the expected effect of stimulus strength on response amplitude ( $F_{3,115} = 11.04$ ;  
153  $P < 0.0001$ ), but not an effect of genotype ( $F_{1,115} = 2.354$ ;  $P = 0.13$ ), nor an interaction  
154 between genotype and stimulus strength ( $F_{3,115} = 0.20$ ;  $P = 0.9$ ). These results show  
155 that AMPAR-mediated synaptic transmission in response to low-intensity stimulation is  
156 similar in WT and *Grin1KD* prefrontal cortex.

157 To isolate NMDAR synaptic responses, we next recorded evoked currents at a  
158 holding potential of +60 mV in the presence of AMPAR and GABA<sub>A</sub> receptor  
159 antagonists, using recording pipette solution designed to block voltage-gated potassium  
160 and sodium channels. Again, there was no genotype difference in the minimal current  
161 required to elicit a response ( $t_{24} = 0.4$ ;  $P = 0.71$ ), nor in response amplitudes across an  
162 increasing range of stimuli (**Fig 1G,H**). We observed the expected effect stimulus  
163 strength on response amplitude ( $F_{3,87} = 12.53$ ;  $P < 0.0001$ ), but no effect of genotype ( $F_{1,}$   
164  $87 = 0.1926$ ;  $P = 0.66$ ), nor an interaction between genotype and stimulus strength ( $F_{3,87} =$   
165  $0.1485$ ;  $P = 0.93$ ). Consistent with the intended NMDAR-mediation of these EPSCs, the  
166 evoked currents were strongly suppressed by the selective NMDAR antagonist, D-APV  
167 (50  $\mu$ M):  $t_{(10)} = 6.1$ ,  $P = 0.0001$ ). These results demonstrate that the amplitudes of  
168 isolated NMDAR currents are similar between genotypes in response to low-intensity  
169 stimulation. This unexpected finding was surprising because of the prominent  
170 differences in the expression of the obligate subunit and NMDAR binding between the  
171 genotypes in previous reports<sup>21,22</sup>.

172 We therefore hypothesized that deficits are more prominent in the extrasynaptic  
173 NMDAR subpopulation, which can be recruited by stronger electrical stimulation to  
174 increase glutamate spillover<sup>29,30</sup>. Therefore, we delivered stronger single stimuli (80  $\mu$ A)  
175 in a subsequent experiment. In contrast to the relatively-homogenous effects of low-  
176 intensity stimulation, stronger stimuli elicited a significant and substantial difference in  
177 NMDAR ePSC amplitude between genotypes (WT: 599  $\pm$  105 pA,  $n$  = 9; Grin1KD: 339  
178  $\pm$  62 pA,  $n$  = 16;  $t_{23}$  = 2.29;  $P$  = 0.032; data not shown). This result prompted a detailed  
179 characterization of extrasynaptic NMDAR in *Grin1*KD mice using multiple approaches.

### 180 ***Deficient extrasynaptic NMDAR responses in Grin1KD mice***

181 To recruit extrasynaptic NMDARs by boosting glutamate spillover, repetitive stimuli in a  
182 20 Hz train were delivered under baseline conditions and then under standard  
183 conditions to increase glutamate spillover<sup>26,27</sup>, suppression of glutamate reuptake with  
184 TBOA and autoinhibition with LY341495 (**Fig 2A,B**). In wild-type mice, repetitive  
185 stimulation led to summation of postsynaptic responses, yielding a higher peak  
186 response compared to the first input, with further potentiation of peak response caused  
187 by glutamate spillover in the presence of TBOA. In *Grin1*KD, by contrast, boosting  
188 spillover did not increase the peak response, leading to a significant interaction between  
189 the genotype and spillover conditions ( $F_{2,16}$  = 11.37;  $P$  = 0.0008). Repetitive stimulation  
190 in the presence of TBOA significantly potentiated the peak response compared to the  
191 first stimulus in WT (Sidak's post hoc test,  $P$  = 0.0001) but not in *Grin1*KD ( $P$  = 0.2).  
192 These results suggest a lack of extrasynaptic NMDARs in *Grin1*KD available to be  
193 recruited by glutamate spillover.

194 To reach an even broader group of extrasynaptic receptors, we activated  
195 NMDARs using direct pharmacological manipulation with the agonist NMDA. For these  
196 experiments, we bath-applied NMDA to the prefrontal slice in the presence of AMPAR  
197 antagonist CNQX and low-Mg<sup>2+</sup> to permit NMDAR activation at a holding potential of -75  
198 mV. As anticipated<sup>23</sup>, pharmacological NMDAR currents were substantially and  
199 significantly reduced in *Grin1*KD mice compared to their littermates (WT: 87  $\pm$  5 pA,  $n$  =  
200 23; *Grin1*KD1: 24  $\pm$  2 pA,  $n$  = 21;  $t_{42}$  = 10.6,  $P$  = 0.0001; **Fig 2C,D**). These  
201 pharmacologically-elicited inward currents were suppressed by D-APV (50  $\mu$ M; WT:  $n$  =



202 5,  $t_4 = 6.2$ ,  $P = 0.003$ ; *Grin1*KD mice:  $n = 7$ ,  $t_6 = 3.5$ ,  $P = 0.01$ ). Of note, the 3-fold  
203 genotype difference in the response to bath NMDA mirrors the difference in NMDAR  
204 binding observed in prefrontal cortex in *Grin1*KD compared to wild-type controls<sup>23</sup>.

205 Stronger, repetitive, and pharmacological stimulations that recruit extrasynaptic  
206 NMDARs all unmask genotype differences between the wild-type littermates and  
207 *Grin1*KD mice, consistent with the interpretation that *Grin1*KD mice have a specific and  
208 disproportionate deficit in extrasynaptic NMDARs.

### 209 ***Impact of extrasynaptic NMDAR disruption: Dendritic plateau potentials***

210 Dendritic plateau potentials can be evoked by spillover of glutamate onto extrasynaptic  
211 NMDARs under conditions of high-frequency repetitive stimulation of inputs to basal  
212 dendrites<sup>7,28</sup>. This integrative phenomenon depends on the recruitment of extrasynaptic  
213 NMDARs (**Fig 3A**), and would be vulnerable if this population were compromised (**Fig**  
214 **3B**). Dendritic plateau potentials are considered an important cognitive substrate to link  
215 multiple streams of incoming information and generate burst firing<sup>16,19,20,31</sup>, an output  
216 signal predicted to exert stronger downstream consequences<sup>32,33</sup>. Deficient  
217 extrasynaptic NMDARs are predicted to have profound consequences for such  
218 signaling<sup>7,28</sup>.

219 To examine basal dendrite plateau potentials in both genotypes, we recorded  
220 from layer 5 pyramidal neurons while electrically stimulating inputs in the basal field.  
221 AMPAR eEPSCs evoked by basal dendritic stimulation were similar between wild-type  
222 and *Grin1*KD mice, had the expected effect of current ( $F_{2,66} = 12.7$ ;  $P = 0.0001$ ), but no  
223 effect of genotype ( $F_{1,66} = 0.148$ ,  $P = 0.7$ ) nor interaction between genotype and current  
224 ( $F_{2,66} = 0.127$ ,  $P = 0.88$ , data not shown). Next, we recorded NMDAR plateau potentials  
225 in current-clamp in response to trains of stimuli (50 Hz, 10 pulses) in the presence of  
226 AMPA and GABA receptor blockade and observed a marked genotype difference (**Fig**  
227 **3C,D**). While wild-type neurons showed clear NMDAR plateau potentials (peak  
228 amplitude:  $2.15 \pm 0.27$  mV,  $n = 8$ ), the train of stimuli did not elicit dendritic plateau  
229 potentials in *Grin1*KD neurons ( $0.48 \pm 0.10$  mV,  $n = 8$ ;  $t_{14} = 5.8$   $P < 0.0001$ ; **Fig 3C,D**).  
230 Plateau potentials in wild-type neurons could be eliminated by the NMDAR antagonist  
231 APV (significant genotype x D-APV interaction:  $F_{1,7} = 7.53$ ,  $P = 0.029$ ; peak amplitude

232 at baseline vs APV in WT:  $t_7 = 4.12$ ,  $P = 0.009$ , Sidak's *post hoc* test, data not shown).  
233 *Grin1*KD prefrontal pyramidal neurons have a significant deficit in dendritic plateau  
234 potentials compared to those recorded in brain slices from wild-type littermate mice.  
235 This measure confirms a profound physiological impact of insensitivity to glutamate  
236 spillover in *Grin1*KD.

### 237 ***Electrophysiological examination of consequences of adult Grin1 rescue***

238 To identify whether a genetic intervention in adulthood could restore crucial aspects of  
239 NMDAR function in *Grin1*KD mice, we tested a tamoxifen-induced Cre-based approach  
240 that has previously been shown to increase prefrontal NMDAR radioligand binding and  
241 reverse key behavioural deficits<sup>23</sup>. Briefly, *Grin1*KD mice with loxP sites flanking an  
242 insertion Neo cassette were crossed with Cre-ERT2 mice and the adult offspring were  
243 treated with tamoxifen (**Fig 4A**). In *Grin1*KD mice with the Cre-ERT2 transgene,  
244 tamoxifen induces Cre-mediated excision of the Neo cassette in *Grin1*, restoring full-  
245 length mRNA expression and NMDAR levels to ~60% of wild-type<sup>23</sup>. These are referred  
246 to as *Grin1*rescue mice. In order to ensure equivalent comparison, all 3 genotypes (WT,  
247 *Grin1*KD, *Grin1*rescue) were treated with tamoxifen at the same age and for the same  
248 time course. Intrinsic electrophysiological properties of prefrontal layer 5 pyramidal  
249 neurons including the resting membrane potential, input resistance, capacitance, and  
250 action potential amplitude were not significantly different across the tamoxifen-treated,  
251 littermate wild-type, *Grin1*KD and *Grin1*rescue mice (**Supplemental Table S2**).

### 252 ***Adult intervention rescues dendritic plateau potentials in prefrontal cortex***

253 To identify whether an adult intervention to boost *Grin1* expression can restore dendritic  
254 plateau potentials in mice after a lifelong deficit, we examined NMDAR plateau  
255 potentials in the three groups of tamoxifen-treated mice. Under these conditions,  
256 *Grin1*KD mice again showed significantly smaller NMDAR plateau potentials compared  
257 to wild-type mice, but there was a striking increase in the amplitude of the NMDAR  
258 plateau potentials in the *Grin1*rescue mice compared to the *Grin1*KD (**Fig 4B**). The  
259 distribution of the data prompted nonparametric analysis (Kruskal Wallis test = 11.30,  $P$   
260 = 0.003; Dunn's *post hoc* tests: WT vs *Grin1*KD,  $Z = 3.18$ ,  $P = 0.004$ ; *Grin1*KD vs  
261 *Grin1*rescue,  $Z = 2.55$ ,  $P = 0.032$ ; but no significant difference WT vs *Grin1*rescue,  $Z =$

262 0.76,  $P = 0.99$ ). Correspondingly, dendritic plateau potentials were significantly  
263 suppressed by D-APV in both WT and *Grin1*rescue mice (Wilcoxon matched-pairs  
264 signed rank test:  $P = 0.016$ ,  $n = 7$ , data not shown).

265 Here we show that increasing expression of the obligate NMDAR subunit in  
266 adulthood is sufficient to restore dendritic plateau potentials, consistent with the  
267 significant behavioural improvement observed previously<sup>23</sup>. These findings suggest that  
268 the boost in *Grin1* expression results in an increase in functional extrasynaptic  
269 NMDARs, as illustrated in the working model in **Fig 5**. This work demonstrates the  
270 potential for adult treatments to restore NMDAR function critical for signal integration.

## 271 **Discussion**

272 Our data reveal that developmental deficiency in the obligate *Grin1* subunit leads to a  
273 profound bias in NMDAR function in the prefrontal cortex. The subpopulation of synaptic  
274 NMDARs recruited by mild stimulation shows markedly greater functional preservation  
275 than the extrasynaptic receptors recruited by stronger, repetitive, or pharmacological  
276 stimuli. To probe the physiological implications of this uneven pattern of NMDAR  
277 disruption, we examined dendritic plateau potentials and identified striking deficits in this  
278 integrative phenomenon in *Grin1*KD mice. Lastly, we discovered that genetic rescue of  
279 *Grin1* expression restores this form of integrative neurophysiology in the mature brain.  
280 Our work suggests that, in mice with NMDAR insufficiency, the window for functional  
281 improvement remains open into adulthood.

## 282 ***Broader relevance of this model of NMDAR insufficiency***

283 The *Grin1*KD mouse has been used as a model to study aspects of schizophrenia,  
284 autism spectrum disorder, and most recently as a general model for variants in *Grin1*  
285 that cause GRIN disorder<sup>34,35</sup>. *Grin1*KD mice most closely model *Grin1*  
286 haploinsufficiency, since they have a genetic modification causing a dramatic reduction  
287 in the amount of GluN1 protein and NMDAR without a change in amino acid sequence  
288 or in the biophysical properties of the receptor. The *Grin1*KD mouse expresses low  
289 levels of the obligate NMDAR subunit with only ~30% of normal cortical NMDARs, as  
290 measured by radioligand binding<sup>21-23</sup>. Understanding the cellular electrophysiological

291 consequences of this substantial deficit is relevant beyond GRIN disorder, since  
292 perturbed NMDAR levels are also a key contributing factor to the symptoms of other  
293 neurodevelopmental disorders, including those arising from variants in DLG3, SHANK3,  
294 and FMRP<sup>5,36-40</sup>. Our investigation of *Grin1*KD mice suggest that patients with reduced  
295 NMDARs are likely to have a functional deficit in extrasynaptic NMDAR, with a relative  
296 preservation of synaptic receptors. Given the historical focus on synaptic NMDAR for  
297 neural communication and extrasynaptic receptors for excitotoxicity, it is remarkable  
298 that the profound cognitive impairments of *Grin1*KD mice could be attributed to  
299 extrasynaptic deficits. It is also striking that rescue experiments in adulthood, which  
300 improve executive function and sensory integration<sup>23</sup>, appear to boost functioning of  
301 this extrasynaptic population to restore dendritic plateau potentials, a measure of  
302 integrative neurophysiology. This combination of findings urges greater attention to  
303 extrasynaptic NMDARs in developmental disorders.

#### 304 ***New perspectives on extrasynaptic NMDARs and their integrative role***

305 Extrasynaptic NMDARs, located perisynaptically<sup>10</sup>, or non-synaptically on dendritic  
306 shafts<sup>10</sup>, used to be predominantly described in terms of pathology and their role in  
307 activating excitotoxic cell death pathways<sup>41</sup>. However, this view is shifting as growing  
308 preclinical research demonstrates the physiological conditions under which  
309 extrasynaptic NMDARs are recruited<sup>15-17</sup>. This recent body of work points to their role in  
310 normal brain function via generation of dendritic plateau potentials<sup>3,4,42</sup>. Extrasynaptic  
311 receptors bind the small amount of glutamate that escapes the synapse, to become  
312 'primed' and ready for rapid activation by subsequent depolarizing input(s). NMDARs on  
313 small dendritic branches are thus positioned to detect the activation of multiple  
314 synapses close together in space and time. Such temporal and spatial integration is  
315 required to generate dendritic plateau potentials<sup>2,7,18,19</sup>. These NMDAR-mediated  
316 integration events trigger burst firing<sup>7,19</sup>, a robust neuronal response<sup>32,33</sup>, thought to be  
317 essential for behaviour-evoked network activity<sup>4,20,43</sup>. Our results indicate that  
318 developmental disorders with reduced NMDARs are likely to have compromised  
319 neurophysiological integration resulting from disrupted extrasynaptic NMDAR  
320 population. Intriguingly, an adult intervention yielding an increase in *Grin1* expression

321 and NMDAR radioligand binding<sup>23</sup> (to ~60% of wild-type), restores the  
322 neurophysiological phenomenon of dendritic plateau potentials. This integrative  
323 recovery is consistent with the marked improvement of cognitive performance observed  
324 after treatment in adulthood<sup>23</sup>.

### 325 ***Subcompartment-specific NMDAR alterations: potential mechanisms and caveats***

326 Disparate functional consequences across NMDAR populations have been observed in  
327 response to different perturbations<sup>44-48</sup>. Research in cell systems demonstrates that  
328 NMDARs move between synaptic and extrasynaptic compartments upon  
329 pharmacological manipulation<sup>44-47</sup>, or exposure to antibodies from people with anti-  
330 NMDAR encephalitis<sup>49</sup>. Receptor trafficking, however, is not the only path to achieve  
331 divergent functional outcomes for synaptic and extrasynaptic NMDAR populations.  
332 Multiple mechanisms for functional NMDAR enhancement display compartmental  
333 specificity, including post-translational modification pathways<sup>50,51</sup>, co-agonism<sup>52-54</sup>, and  
334 mechanisms of receptor desensitization<sup>55-57</sup>. The functional preservation of synaptic  
335 NMDAR responses in *Grin1KD* mice may therefore be caused by multiple complex  
336 mechanisms, and not necessarily reflect wild-type levels of receptor density in this  
337 compartment<sup>23</sup>.

338 While NMDARs are the focus of a large body of work in models of  
339 neurodevelopmental disorders, many characterizations use relatively strong stimuli  
340 under conditions where 'synaptic' measures may inadvertently include a broader  
341 population. Here, we pursued carefully calibrated electrical stimulation under several  
342 conditions to isolate synaptic NMDARs from their extrasynaptic counterparts. Our  
343 strategy was adopted due to the inherent challenges in separating these contributions  
344 with pharmacological tools<sup>58,59</sup>. This problem is particularly difficult to overcome in the  
345 prefrontal cortex, where synaptic and extrasynaptic NMDARs show a high degree of  
346 overlap in molecular composition and pharmacological affinities<sup>60,61</sup>, complicating  
347 specific manipulations. Differentiating synaptic and extrasynaptic NMDAR populations  
348 remains a challenging, but increasingly important, focus for future work into the  
349 mechanisms of cognitive compromise arising from NMDAR insufficiency.

### 350 ***Clinical relevance and future implications***

351 Current treatments for cognitive disability arising from genetic disruption of NMDARs  
352 focus on supportive therapies because it is assumed that lifting cognitive restrictions  
353 hard-wired by abnormal brain development is impossible. However, this assumption has  
354 recently been challenged. Promising preclinical data<sup>23,62,63</sup> suggest the potential for  
355 cognitive improvement, even when intervention is delayed until adulthood. If adult  
356 treatments are to be seriously pursued, it is essential to appreciate what neural  
357 components are functionally compromised and what may be preserved. Here, we  
358 address a critical knowledge gap about the specific cellular and circuit mechanisms by  
359 which genetic NMDAR disruption impairs cognitive function. We demonstrate that two  
360 important NMDAR subpopulations do not suffer equal consequences from genetic disruption of  
361 the obligate subunit *Grin1*. Extrasynaptic NMDARs are disproportionately compromised with  
362 resulting disruption of the integrative capacity required for the generation of dendritic plateau  
363 potentials. This deficit, strikingly, proves amenable to rescue by intervention in adulthood.  
364 Developing effective treatments for the cognitive impairments caused by NMDAR disruption  
365 requires the identification of the most efficient targets. Our discovery underscores the need  
366 for research into additional approaches to safely enhance extrasynaptic NMDAR  
367 functioning. Overall, our findings suggest that deficient integrative mechanisms are amenable  
368 to improvement, even with adult intervention.



## 369 **References**

- 370 1. Xu NL, Harnett MT, Williams SR, Huber D, O'Connor DH, Svoboda K, Magee JC. Nonlinear  
371 dendritic integration of sensory and motor input during an active sensing task. *Nature* 2012;492:247-51.
- 372 2. Palmer LM, Shai AS, Reeve JE, Anderson HL, Paulsen O, Larkum ME. NMDA spikes enhance  
373 action potential generation during sensory input. *Nature Neuroscience* 2014;17:383.
- 374 3. Gambino F, Pages S, Kehayas V, Baptista D, Tatti R, Carleton A, Holtmaat A. Sensory-evoked LTP  
375 driven by dendritic plateau potentials in vivo. *Nature* 2014;515:116-9.
- 376 4. Pages S, Chenouard N, Chereau R, Kouskoff V, Gambino F, Holtmaat A. An increase in dendritic  
377 plateau potentials is associated with experience-dependent cortical map reorganization. *Proc Natl Acad Sci U S A* 2021;118.
- 378 5. Lemke JR, Geider K, Helbig KL, Heyne HO, Schutz H, Hentschel J, Courage C, Depienne C, Nava C,  
379 Heron D, et al. Delineating the GRIN1 phenotypic spectrum: A distinct genetic NMDA receptor  
380 encephalopathy. *Neurology* 2016;86:2171-8.
- 381 6. Chen W, Shieh C, Swanger SA, Tankovic A, Au M, McGuire M, Tagliati M, Graham JM, Madan-  
382 Khetarpal S, Traynelis SF, et al. GRIN1 mutation associated with intellectual disability alters NMDA  
383 receptor trafficking and function. *J Hum Genet* 2017;62:589-97.
- 384 7. Polsky A, Mel B, Schiller J. Encoding and decoding bursts by NMDA spikes in basal dendrites of  
385 layer 5 pyramidal neurons. *J Neurosci* 2009;29:11891-903.
- 386 8. Lafourcade M, van der Goes MH, Vardalaki D, Brown NJ, Voigts J, Yun DH, Kim ME, Ku T, Harnett  
387 MT. Differential dendritic integration of long-range inputs in association cortex via subcellular changes in  
388 synaptic AMPA-to-NMDA receptor ratio. *Neuron* 2022;110:1532-46 e4.
- 389 9. Lau CG, Zukin RS. NMDA receptor trafficking in synaptic plasticity and neuropsychiatric  
390 disorders. *Nat Rev Neurosci* 2007;8:413-26.
- 391 10. Petralia RS, Wang YX, Hua F, Yi Z, Zhou A, Ge L, Stephenson FA, Wenthold RJ. Organization of  
392 NMDA receptors at extrasynaptic locations. *Neuroscience* 2010;167:68-87.
- 393 11. Rao A, Craig AM. Activity regulates the synaptic localization of the NMDA receptor in  
394 hippocampal neurons. *Neuron* 1997;19:801-12.
- 395 12. Crump FT, Dillman KS, Craig AM. cAMP-dependent protein kinase mediates activity-regulated  
396 synaptic targeting of NMDA receptors. *J Neurosci* 2001;21:5079-88.
- 397 13. Tse YC, Lopez J, Moquin A, Wong SA, Maysinger D, Wong TP. The susceptibility to chronic social  
398 defeat stress is related to low hippocampal extrasynaptic NMDA receptor function.  
399 *Neuropsychopharmacology* 2019;44:1310-8.
- 400 14. Rajani V, Sengar AS, Salter MW. Src and Fyn regulation of NMDA receptors in health and disease.  
401 *Neuropharmacology* 2021;193:108615.
- 402 15. Hires SA, Zhu Y, Tsien RY. Optical measurement of synaptic glutamate spillover and reuptake by  
403 linker optimized glutamate-sensitive fluorescent reporters. *Proc Natl Acad Sci U S A* 2008;105:4411-6.
- 404 16. Chalifoux JR, Carter AG. Glutamate spillover promotes the generation of NMDA spikes. *J*  
405 *Neurosci* 2011;31:16435-46.
- 406 17. Armbruster M, Hanson E, Dulla CG. Glutamate Clearance Is Locally Modulated by Presynaptic  
407 Neuronal Activity in the Cerebral Cortex. *J Neurosci* 2016;36:10404-15.
- 408 18. Schiller J, Major G, Koester HJ, Schiller Y. NMDA spikes in basal dendrites of cortical pyramidal  
409 neurons. *Nature* 2000;404:285-9.
- 410 19. Rhodes P. The properties and implications of NMDA spikes in neocortical pyramidal cells. *J*  
411 *Neurosci* 2006;26:6704-15.
- 412 20. Gao PP, Graham JW, Zhou WL, Jang J, Angulo S, Dura-Bernal S, Hines M, Lytton WW, Antic SD.  
413 Local glutamate-mediated dendritic plateau potentials change the state of the cortical pyramidal  
414 neuron. *J Neurophysiol* 2021;125:23-42.
- 415

- 416 21. Mohn AR, Gainetdinov RR, Caron MG, Koller BH. Mice with reduced NMDA receptor expression  
417 display behaviors related to schizophrenia. *Cell* 1999;98:427-36.
- 418 22. Duncan G, Miyamoto S, Gu H, Lieberman J, Koller B, Snouwaert J. Alterations in regional brain  
419 metabolism in genetic and pharmacological models of reduced NMDA receptor function. *Brain Res*  
420 2002;951:166-76.
- 421 23. Mielnik CA, Binko MA, Chen Y, Funk AJ, Johansson EM, Intson K, Sivananthan N, Islam R,  
422 Milenkovic M, Horsfall W, et al. Consequences of NMDA receptor deficiency can be rescued in the adult  
423 brain. *Mol Psychiatry* 2021;26:2929-42.
- 424 24. Antoine MW, Langberg T, Schnepel P, Feldman DE. Increased Excitation-Inhibition Ratio  
425 Stabilizes Synapse and Circuit Excitability in Four Autism Mouse Models. *Neuron* 2019;101:648-61 e4.
- 426 25. Venkatesan S, Lambe E. ChRNA5 is essential for a rapid and protected response to optogenetic  
427 release of endogenous acetylcholine in prefrontal cortex. *bioRxiv* 2020:2020.05.10.087569.
- 428 26. Chen S, Diamond JS. Synaptically released glutamate activates extrasynaptic NMDA receptors on  
429 cells in the ganglion cell layer of rat retina. *J Neurosci* 2002;22:2165-73.
- 430 27. Wild AR, Bolland M, Morris PG, Jones S. Mechanisms regulating spill-over of synaptic glutamate  
431 to extrasynaptic NMDA receptors in mouse substantia nigra dopaminergic neurons. *Eur J Neurosci*  
432 2015;42:2633-43.
- 433 28. Major G, Polsky A, Denk W, Schiller J, Tank DW. Spatiotemporally graded NMDA spike/plateau  
434 potentials in basal dendrites of neocortical pyramidal neurons. *J Neurophysiol* 2008;99:2584-601.
- 435 29. Nie H, Weng HR. Glutamate transporters prevent excessive activation of NMDA receptors and  
436 extrasynaptic glutamate spillover in the spinal dorsal horn. *J Neurophysiol* 2009;101:2041-51.
- 437 30. Anderson CT, Radford RJ, Zastrow ML, Zhang DY, Apfel UP, Lippard SJ, Tzounopoulos T.  
438 Modulation of extrasynaptic NMDA receptors by synaptic and tonic zinc. *Proc Natl Acad Sci U S A*  
439 2015;112:E2705-14.
- 440 31. Little JP, Carter AG. Subcellular synaptic connectivity of layer 2 pyramidal neurons in the medial  
441 prefrontal cortex. *J Neurosci* 2012;32:12808-19.
- 442 32. Snider RK, Kabara JF, Roig BR, Bonds AB. Burst firing and modulation of functional connectivity  
443 in cat striate cortex. *J Neurophysiol* 1998;80:730-44.
- 444 33. Chan HK, Yang DP, Zhou C, Nowotny T. Burst Firing Enhances Neural Output Correlation. *Front*  
445 *Comput Neurosci* 2016;10:42.
- 446 34. Benke TA, Park K, Krey I, Camp CR, Song R, Ramsey AJ, Yuan H, Traynelis SF, Lemke J. Clinical and  
447 therapeutic significance of genetic variation in the GRIN gene family encoding NMDARs.  
448 *Neuropharmacology* 2021;199:108805.
- 449 35. Intson K, van Eede MC, Islam R, Milenkovic M, Yan Y, Salahpour A, Henkelman RM, Ramsey AJ.  
450 Progressive neuroanatomical changes caused by Grin1 loss-of-function mutation. *Neurobiol Dis*  
451 2019:104527.
- 452 36. Tarpey P, Parnau J, Blow M, Woffendin H, Bignell G, Cox C, Cox J, Davies H, Edkins S, Holden S, et  
453 al. Mutations in the DLG3 gene cause nonsyndromic X-linked mental retardation. *Am J Hum Genet*  
454 2004;75:318-24.
- 455 37. Duffney LJ, Wei J, Cheng J, Liu W, Smith KR, Kittler JT, Yan Z. Shank3 deficiency induces NMDA  
456 receptor hypofunction via an actin-dependent mechanism. *J Neurosci* 2013;33:15767-78.
- 457 38. Gonatopoulos-Pournatzis T, Niibori R, Salter EW, Weatheritt RJ, Tsang B, Farhangmehr S, Liang  
458 X, Braunschweig U, Roth J, Zhang S, et al. Autism-Misregulated eIF4G Microexons Control Synaptic  
459 Translation and Higher Order Cognitive Functions. *Mol Cell* 2020;77:1176-92 e16.
- 460 39. Uzunova G, Hollander E, Shepherd J. The role of ionotropic glutamate receptors in childhood  
461 neurodevelopmental disorders: autism spectrum disorders and fragile x syndrome. *Curr*  
462 *Neuropharmacol* 2014;12:71-98.

- 463 40. Ohba C, Shiina M, Tohyama J, Haginoya K, Lerman-Sagie T, Okamoto N, Blumkin L, Lev D,  
464 Mukaida S, Nozaki F, et al. GRIN1 mutations cause encephalopathy with infantile-onset epilepsy, and  
465 hyperkinetic and stereotyped movement disorders. *Epilepsia* 2015;56:841-8.
- 466 41. Parsons MP, Raymond LA. Extrasynaptic NMDA receptor involvement in central nervous system  
467 disorders. *Neuron* 2014;82:279-93.
- 468 42. Kerlin A, Mohar B, Flickinger D, MacLennan BJ, Dean MB, Davis C, Spruston N, Svoboda K.  
469 Functional clustering of dendritic activity during decision-making. *Elife* 2019;8.
- 470 43. Oikonomou KD, Singh MB, Sterjanaj EV, Antic SD. Spiny neurons of amygdala, striatum, and  
471 cortex use dendritic plateau potentials to detect network UP states. *Front Cell Neurosci* 2014;8:292.
- 472 44. Fong DK, Rao A, Crump FT, Craig AM. Rapid synaptic remodeling by protein kinase C: reciprocal  
473 translocation of NMDA receptors and calcium/calmodulin-dependent kinase II. *J Neurosci* 2002;22:2153-  
474 64.
- 475 45. Tovar KR, Westbrook GL. Mobile NMDA receptors at hippocampal synapses. *Neuron*  
476 2002;34:255-64.
- 477 46. Groc L, Heine M, Cousins SL, Stephenson FA, Lounis B, Cognet L, Choquet D. NMDA receptor  
478 surface mobility depends on NR2A-2B subunits. *Proc Natl Acad Sci U S A* 2006;103:18769-74.
- 479 47. Ferreira JS, Papouin T, Ladépêche L, Yao A, Langlais VC, Bouchet D, Dulong J, Mothet J-P, Sacchi  
480 S, Pollegioni L, et al. Co-agonists differentially tune GluN2B-NMDA receptor trafficking at hippocampal  
481 synapses. *eLife* 2017;6:e25492.
- 482 48. Jézéquel J, Johansson EM, Dupuis JP, Rogemond V, Gréa H, Kellermayer B, Hamdani N, Le Guen  
483 E, Rabu C, Lepleux M, et al. Dynamic disorganization of synaptic NMDA receptors triggered by  
484 autoantibodies from psychotic patients. *Nature communications* 2017;8:1791-.
- 485 49. Ladépêche L, Planagumà J, Thakur S, Suárez I, Hara M, Borbely JS, Sandoval A, Laparra-Cuervo L,  
486 Dalmau J, Lakadamyali M. NMDA Receptor Autoantibodies in Autoimmune Encephalitis Cause a Subunit-  
487 Specific Nanoscale Redistribution of NMDA Receptors. *Cell reports* 2018;23:3759-68.
- 488 50. Yu XM, Askalan R, Keil GJ, 2nd, Salter MW. NMDA channel regulation by channel-associated  
489 protein tyrosine kinase Src. *Science* 1997;275:674-8.
- 490 51. Yu XM, Salter MW. Gain control of NMDA-receptor currents by intracellular sodium. *Nature*  
491 1998;396:469-74.
- 492 52. Fossat P, Turpin FR, Sacchi S, Dulong J, Shi T, Rivet JM, Sweedler JV, Pollegioni L, Millan MJ, Oliet  
493 SH, et al. Glial D-serine gates NMDA receptors at excitatory synapses in prefrontal cortex. *Cereb Cortex*  
494 2012;22:595-606.
- 495 53. Papouin T, Ladepeche L, Ruel J, Sacchi S, Labasque M, Hanini M, Groc L, Pollegioni L, Mothet JP,  
496 Oliet SH. Synaptic and extrasynaptic NMDA receptors are gated by different endogenous coagonists. *Cell*  
497 2012;150:633-46.
- 498 54. Martineau M, Parpura V, Mothet JP. Cell-type specific mechanisms of D-serine uptake and  
499 release in the brain. *Front Synaptic Neurosci* 2014;6:12.
- 500 55. Tong G, Shepherd D, Jahr CE. Synaptic desensitization of NMDA receptors by calcineurin. *Science*  
501 1995;267:1510-2.
- 502 56. Ehlers MD, Zhang S, Bernhardt JP, Huganir RL. Inactivation of NMDA receptors by direct  
503 interaction of calmodulin with the NR1 subunit. *Cell* 1996;84:745-55.
- 504 57. Lau LF, Mammen A, Ehlers MD, Kindler S, Chung WJ, Garner CC, Huganir RL. Interaction of the N-  
505 methyl-D-aspartate receptor complex with a novel synapse-associated protein, SAP102. *J Biol Chem*  
506 1996;271:21622-8.
- 507 58. Cull-Candy SG, Leszkiewicz DN. Role of distinct NMDA receptor subtypes at central synapses. *Sci*  
508 *STKE* 2004;2004:re16.
- 509 59. Neyton J, Paoletti P. Relating NMDA receptor function to receptor subunit composition:  
510 limitations of the pharmacological approach. *J Neurosci* 2006;26:1331-3.

- 511 60. Wang H, Stradtman GG, 3rd, Wang XJ, Gao WJ. A specialized NMDA receptor function in layer 5  
512 recurrent microcircuitry of the adult rat prefrontal cortex. *Proc Natl Acad Sci U S A* 2008;105:16791-6.  
513 61. Wang M, Yang Y, Wang CJ, Gamo NJ, Jin LE, Mazer JA, Morrison JH, Wang XJ, Arnsten AF. NMDA  
514 receptors subserve persistent neuronal firing during working memory in dorsolateral prefrontal cortex.  
515 *Neuron* 2013;77:736-49.  
516 62. Guy J, Gan J, Selfridge J, Cobb S, Bird A. Reversal of neurological defects in a mouse model of  
517 Rett syndrome. *Science* 2007;315:1143-7.  
518 63. Mei Y, Monteiro P, Zhou Y, Kim JA, Gao X, Fu Z, Feng G. Adult restoration of Shank3 expression  
519 rescues selective autistic-like phenotypes. *Nature* 2016;530:481-4.

520

521

522 **Figure Legends**

523 **Figure 1. Wild-type and *Grin1KD* have similar intrinsic excitability and**  
524 **postsynaptic AMPA and NMDA receptor responses. (A)** Schematic of the prefrontal  
525 cortex with electrophysiological recording from layer 5 pyramidal neuron. **(B)** Example  
526 current-clamp traces from WT (left) and *Grin1KD* (right) in response to depolarizing  
527 current steps through the recording pipette. **(C)** Input-output graphs of spike frequency  
528 (Hz) in current-clamp for WT ( $n = 20$ ) and *Grin1KD* ( $n = 25$ ). **(D)** Schematic of recording  
529 pipette with extracellular stimulating electrode for assessment of postsynaptic currents.  
530 **(E)** Example voltage-clamp traces ( $V_h -75$  mV) show inward AMPA receptor (AMPA)-  
531 mediated electrically-evoked excitatory postsynaptic currents (eEPSC) in WT and  
532 *Grin1KD*. **(F)** Graph illustrates that WT ( $n = 15$ ) and *Grin1KD* ( $n = 13$ ) both show the  
533 expected relationship between stimulus strength eEPSC amplitude but no significant  
534 effect of genotype nor interaction for AMPAR eEPSCs. **(G)** Example voltage-clamp  
535 traces ( $V_h +60$  mV) show outward NMDA receptor (NMDAR)-mediated evoked  
536 postsynaptic currents (ePSCs), isolated with AMPAR and GABA receptor blockade and  
537 recorded with pipette solution to internally block voltage-gated potassium and sodium  
538 channels. **(H)** Graph illustrates that both WT ( $n = 10$ ) and *Grin1KD* ( $n = 15$ ) show the  
539 expected relationship between stimulus strength and NMDAR ePSC amplitude, but no  
540 significant effect of genotype nor interaction for these ePSCs. Data is represented as  
541 mean  $\pm$  SEM.

542 **Figure 2. Extrasynaptic NMDARs are not recruited in *Grin1KD* mice during**  
543 **glutamate spillover. (A)** Voltage-clamp traces ( $V_h +60$  mV) show NMDAR-mediated  
544 outward currents during AMPAR blockade in WT (above) and *Grin1KD* (below) evoked  
545 by a stimulus train (20 Hz, 10 pulses) under baseline conditions and with the addition of  
546 TBOA and LY341495 to enhance glutamate spillover (red line). The dotted line  
547 illustrates the consistency of the first evoked postsynaptic current. NMDAR responses  
548 isolated with AMPAR and GABA receptor blockade. **(B)** The bar graph shows the  
549 significant potentiation of the peak amplitude in the stimulus train under conditions of  
550 enhanced glutamate spillover for WT ( $n = 4$ ) but not *Grin1KD* ( $n = 6$ ); significant  
551 interaction of genotype and spillover condition ( $***P < 0.001$ ). **(C)** Voltage-clamp traces

552 show bath application of NMDA to pharmacologically stimulate NMDAR in WT (left) and  
553 *Grin1*KD (right). (D) The bar graph shows the peak amplitude of pharmacologically-  
554 elicited inward NMDA currents is significantly lower in *Grin1*KD ( $n = 21$ ) compared to  
555 WT ( $n = 23$ ) (\*\*\*\* $P \leq 0.0001$ ). Data represented as mean  $\pm$  SEM.

556 **Figure 3. Deficits in extrasynaptic NMDA receptors disrupt integrative basal**  
557 **dendrite plateau potentials in *Grin1*KD.** Schematics depict hypothesized differences  
558 in extrasynaptic NMDA receptors (NMDARs) between (A) WT and (B) *Grin1*KD. The  
559 initial stimulus (1.) yields glutamate spillover that permits priming of extrasynaptic  
560 NMDARs during the inter-stimulus interval (2.) making them available to be activated  
561 immediately by depolarization from the next stimulus (3.). This form of integration is  
562 sufficient to yield a dendritic plateau potential in response to repeated mild stimulation  
563 and is typically measured in current-clamp. (C) Inset: Schematic of layer 5 pyramidal  
564 cell recording with stimulation in the basal dendritic field. Averaged current-clamp  
565 recordings of excitatory responses to repeated minimal stimulation (50 Hz, 10 pulses,  
566 30-40  $\mu$ A) in WT (black,  $n = 8$ ) and *Grin1*KD (gray,  $n = 8$ ). NMDAR-mediated dendritic  
567 plateaus isolated with AMPA and GABA receptor blockade. (D) Graph of peak plateau  
568 amplitude illustrates that basal dendrite integration is substantially reduced in *Grin1*KD  
569 mice compared to WT (\*\*\*\*  $P < 0.0001$ ). Data represented as mean  $\pm$  SEM.

570 **Figure 4. Adult genetic intervention to boost *Grin1* expression restores dendritic**  
571 **plateau potentials.** (A) *Grin1*rescue schematic illustrates strategy for enhancing *Grin1*  
572 expression and increasing NMDAR density in adulthood (adapted from Mielnik and  
573 colleagues<sup>23</sup>). All mice are treated with tamoxifen in adulthood but only in *Grin1*rescue  
574 will this treatment trigger Cre expression and lead to the excision of the Neo cassette to  
575 increase *Grin1* mRNA, NMDAR radioligand binding, and cognitive performance  
576 significantly<sup>23</sup>. (B) Averaged current-clamp recordings of responses to repeated mild  
577 stimulation (50 Hz, 10 pulses, 40  $\mu$ A) in the 3 genotypes of mice all treated with  
578 tamoxifen in adulthood: WT (black,  $n = 17$ ), *Grin1*KD (gray,  $n = 18$ ), and *Grin1*rescue  
579 (red,  $n = 21$ ). (C) Graph illustrates that basal dendrite integration is greatly reduced in  
580 *Grin1*KD compared to WT and is restored in the *Grin1*rescue (\*\* $P < 0.01$ , \* $P < 0.05$ ).  
581 Data represented as mean  $\pm$  SEM.



582

583 **Figure 5. Working model schematics for prefrontal synapses across the three**  
584 **genotypes.** In wild-type mice (WT), prefrontal neurons have both synaptic and  
585 extrasynaptic NMDARs. In *Grin1*KD mice, there is relative preservation of synaptic  
586 NMDARs and disproportionate compromise of extrasynaptic NMDARs. In *Grin1*rescue  
587 mice, adult manipulation to boost *Grin1* expression is successful and sufficient to  
588 restore extrasynaptic NMDARs needed for dendritic integration of repetitive mild stimuli.  
589

**A**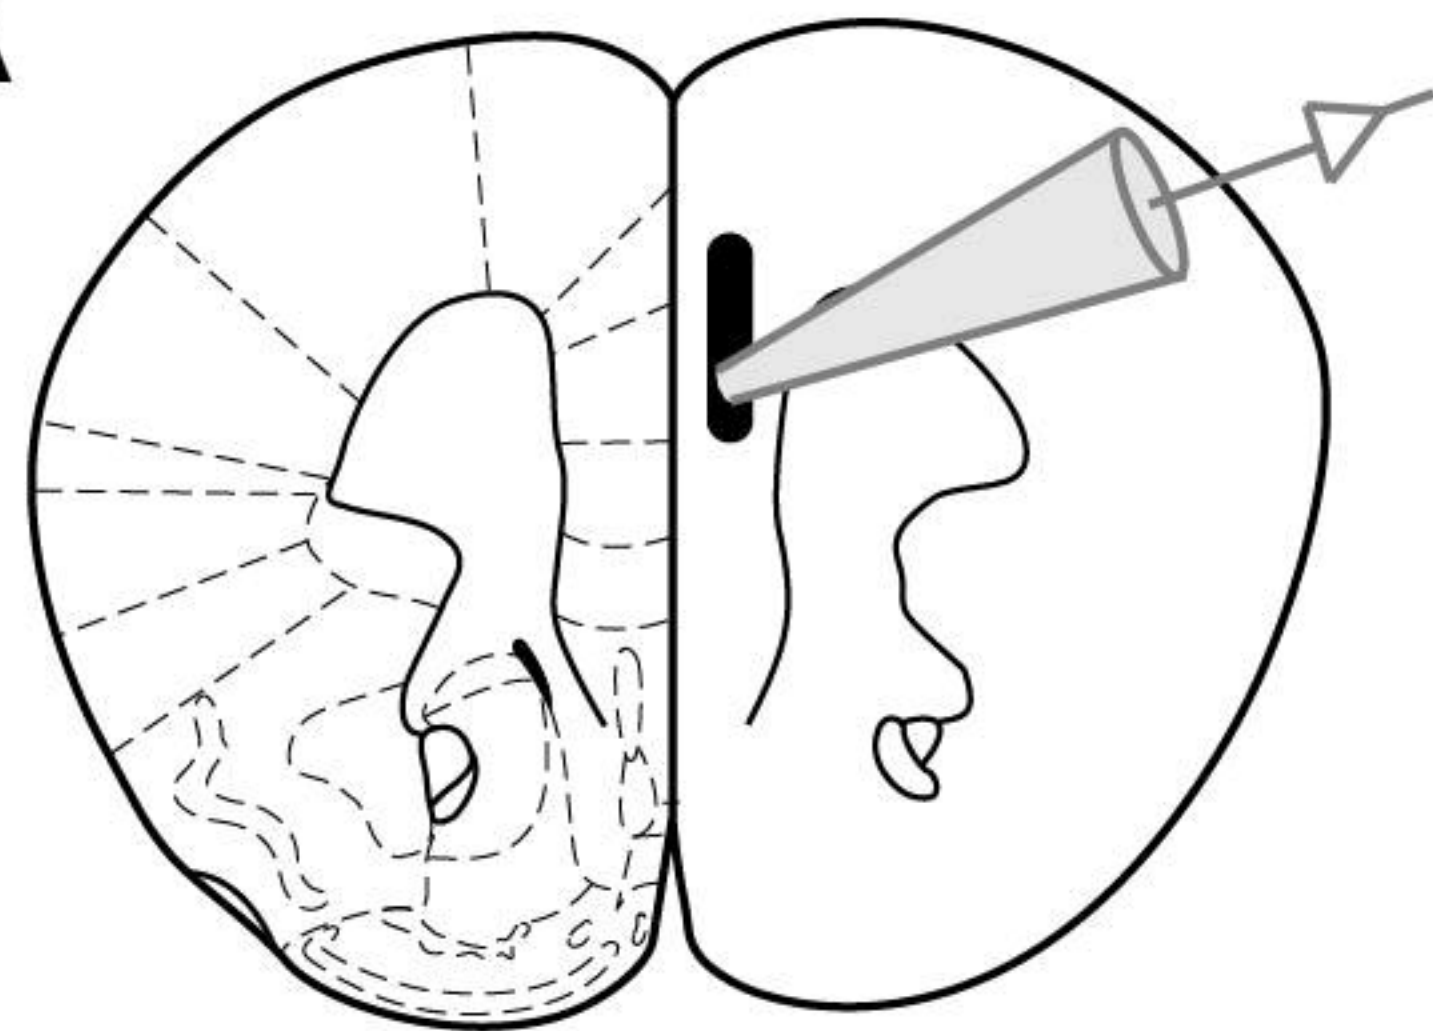**B**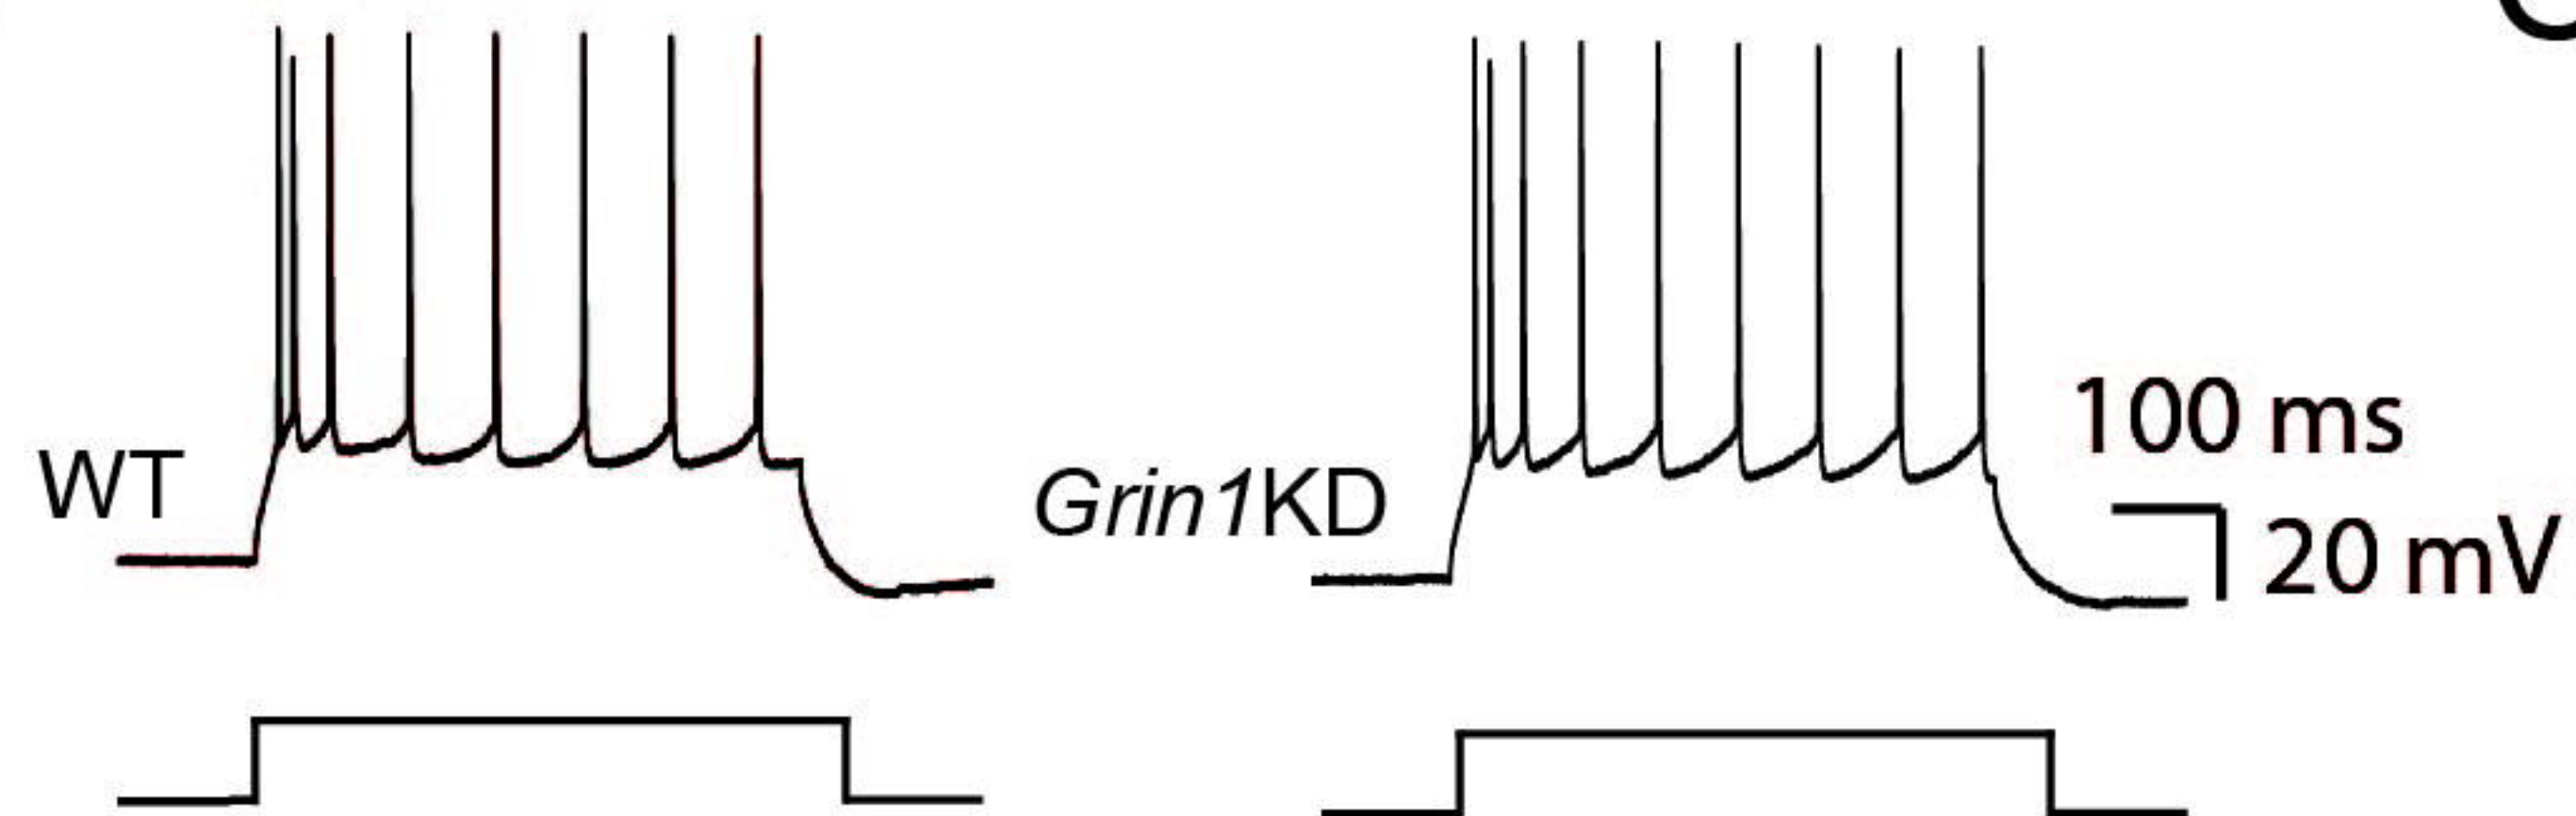**C**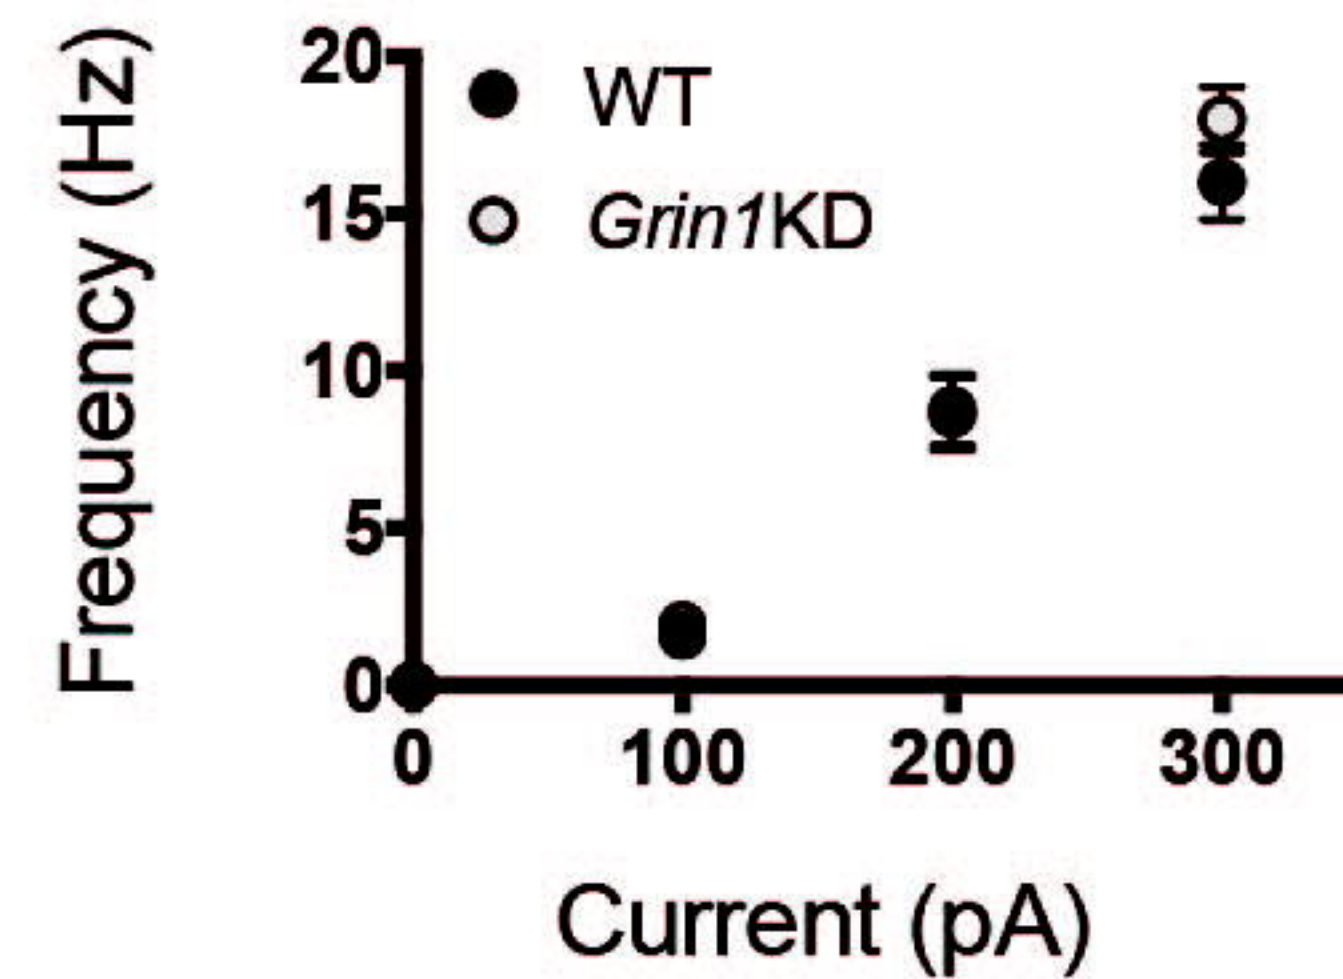**D**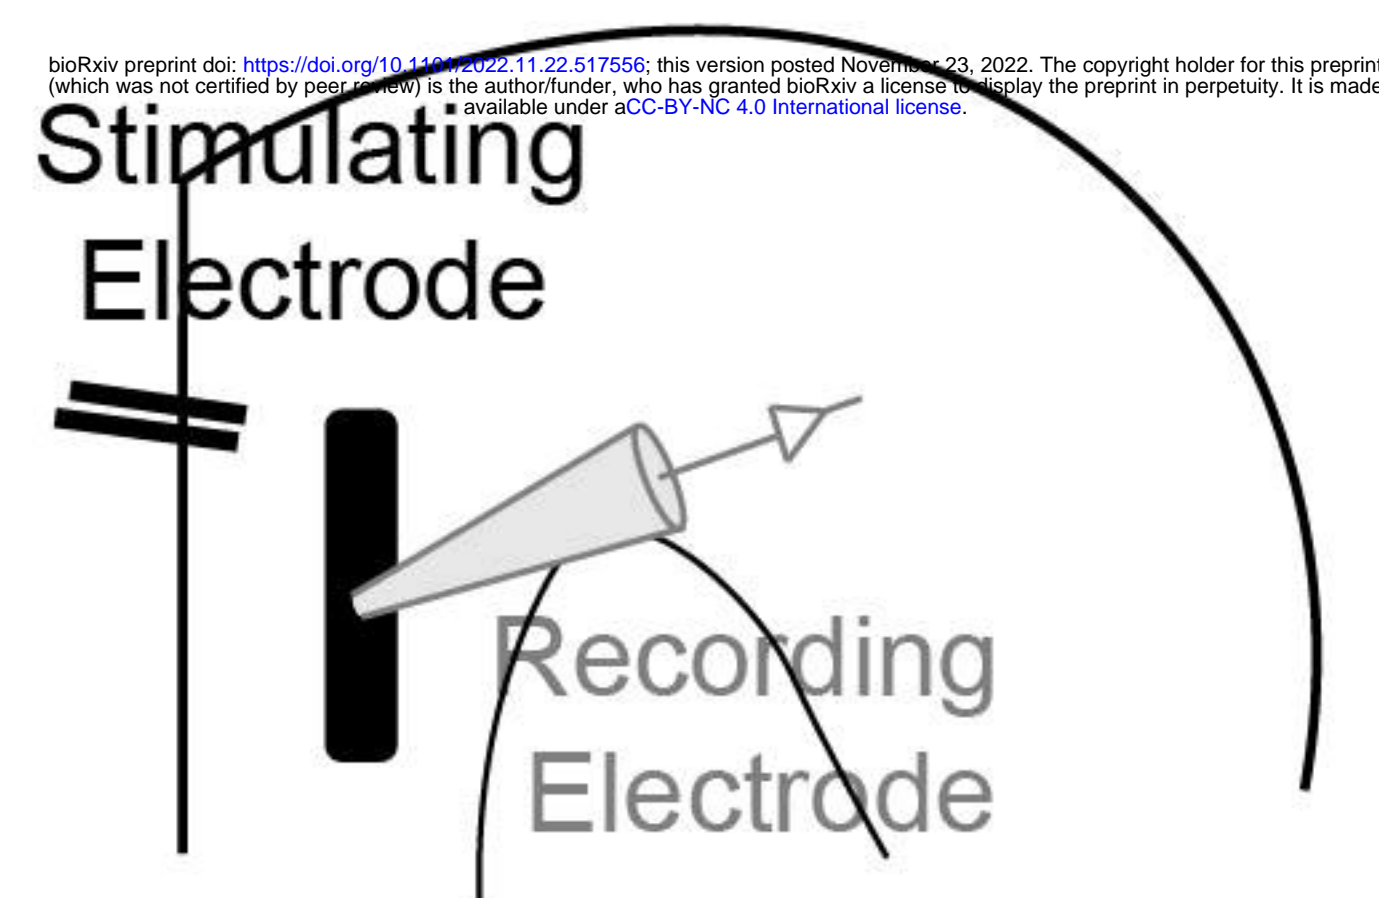**E**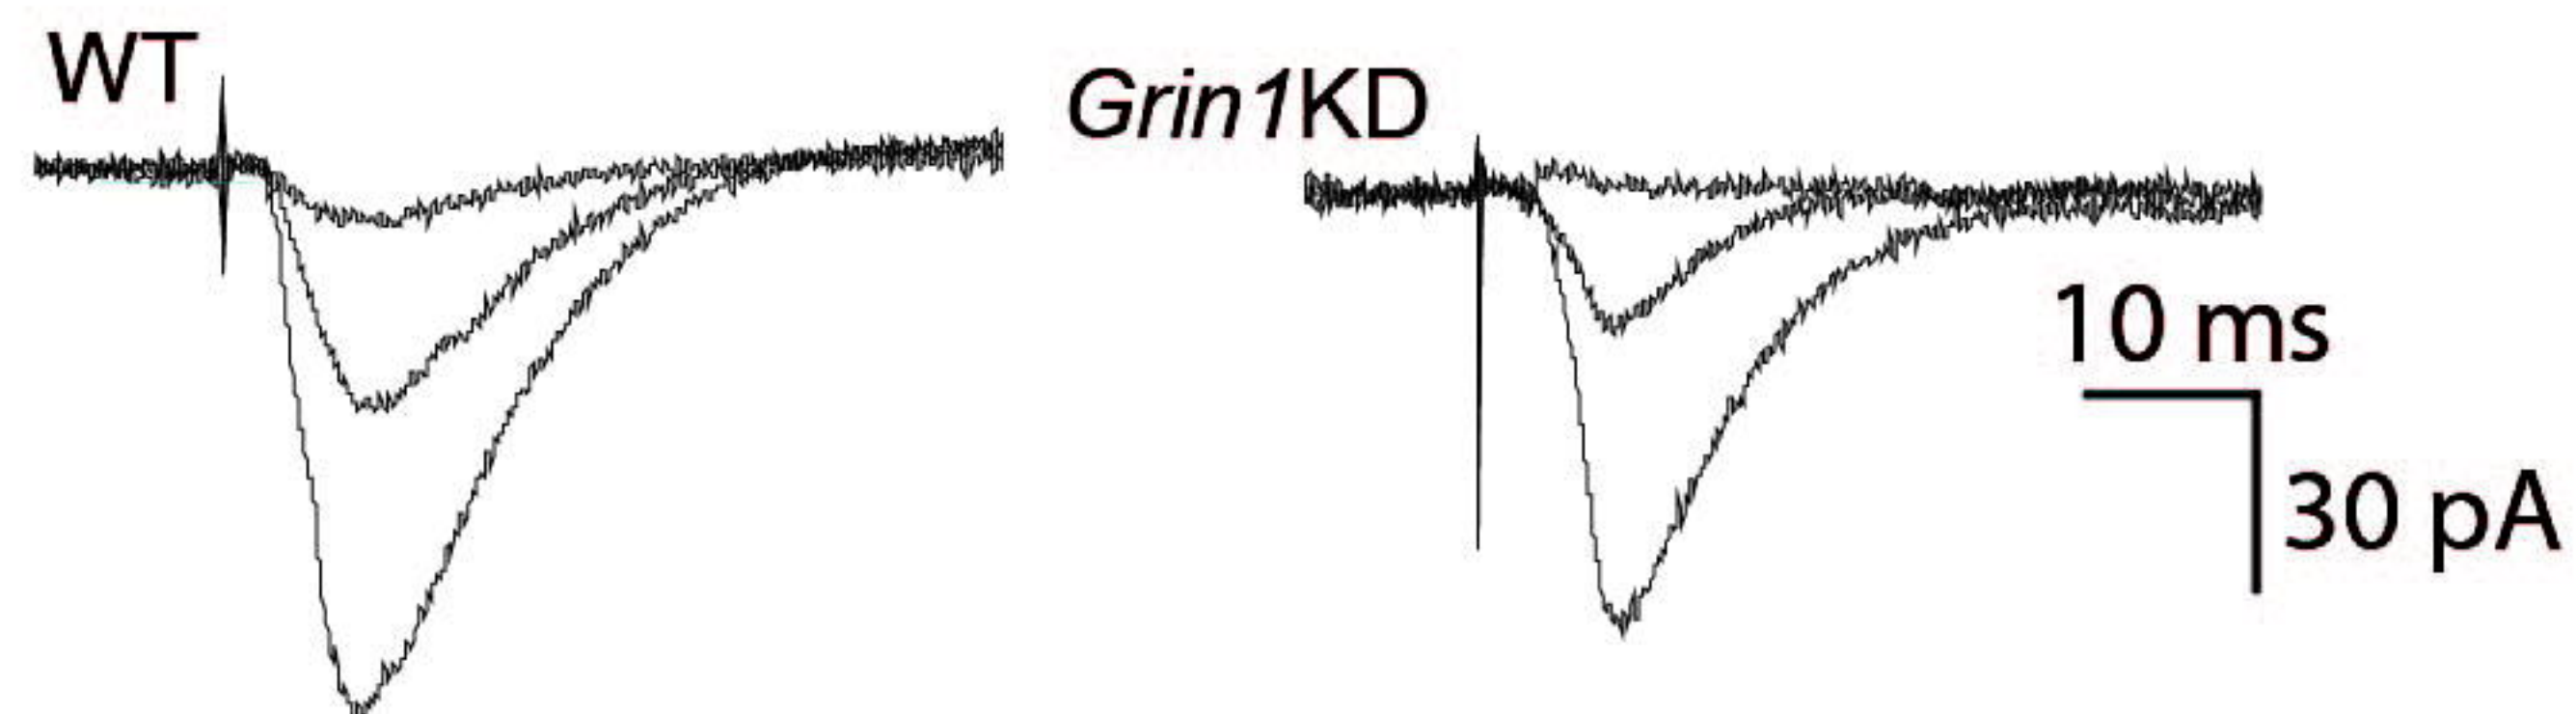**F**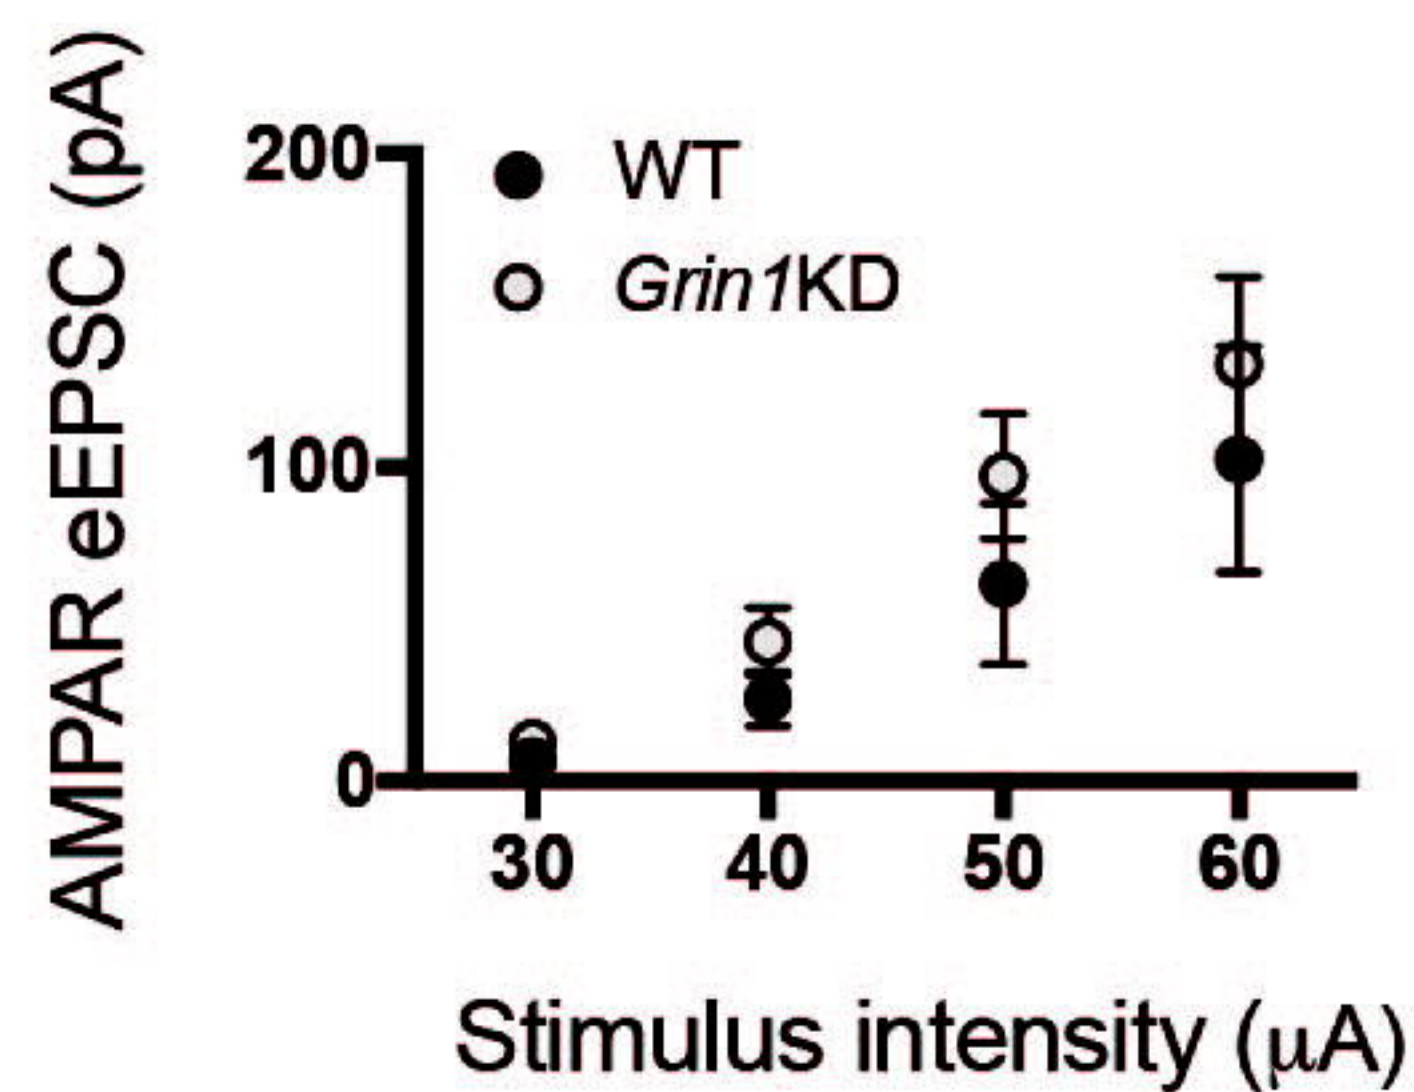**G**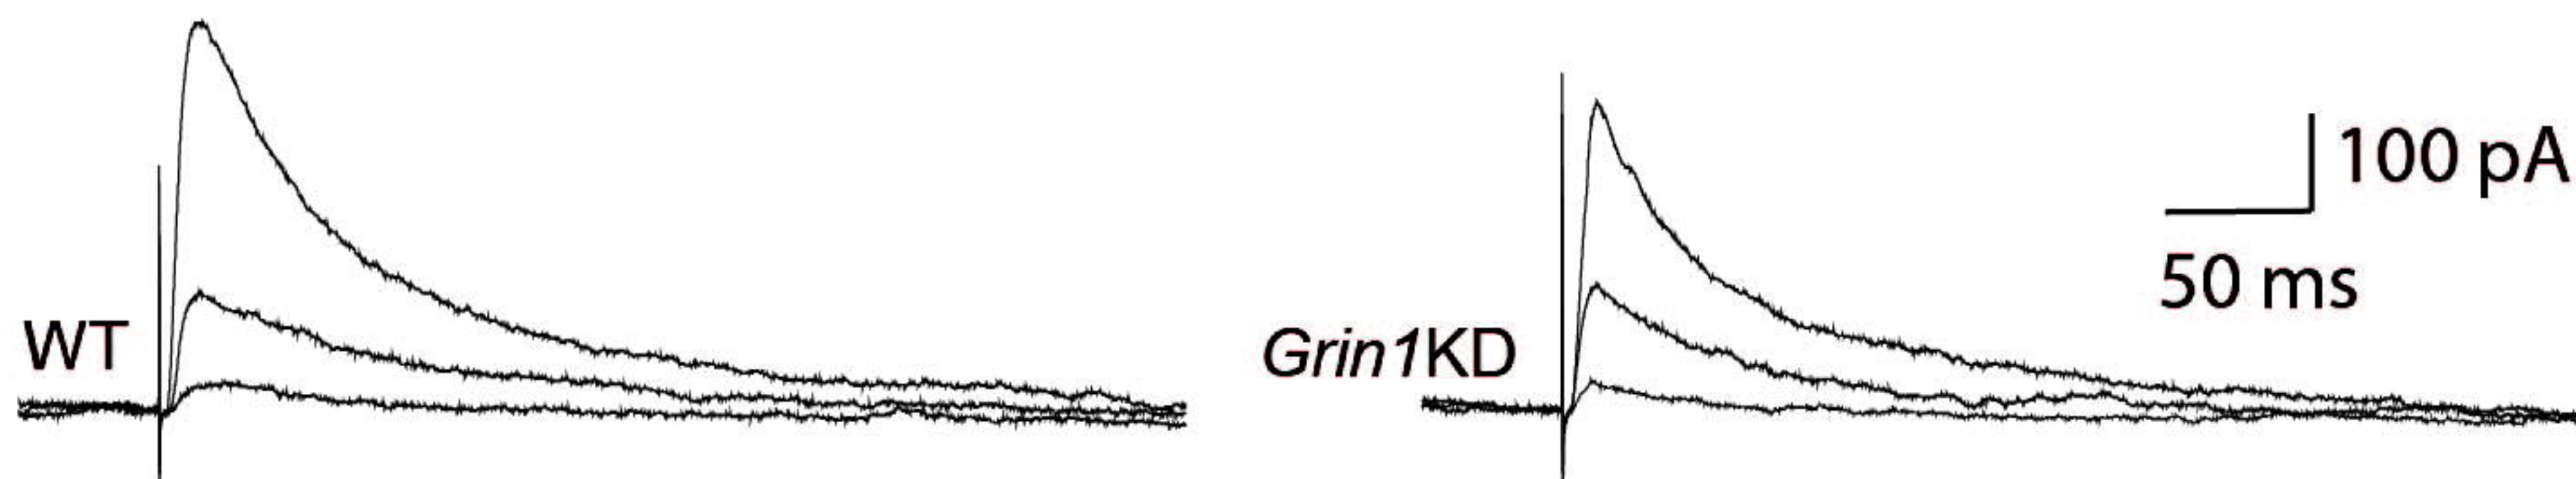**H**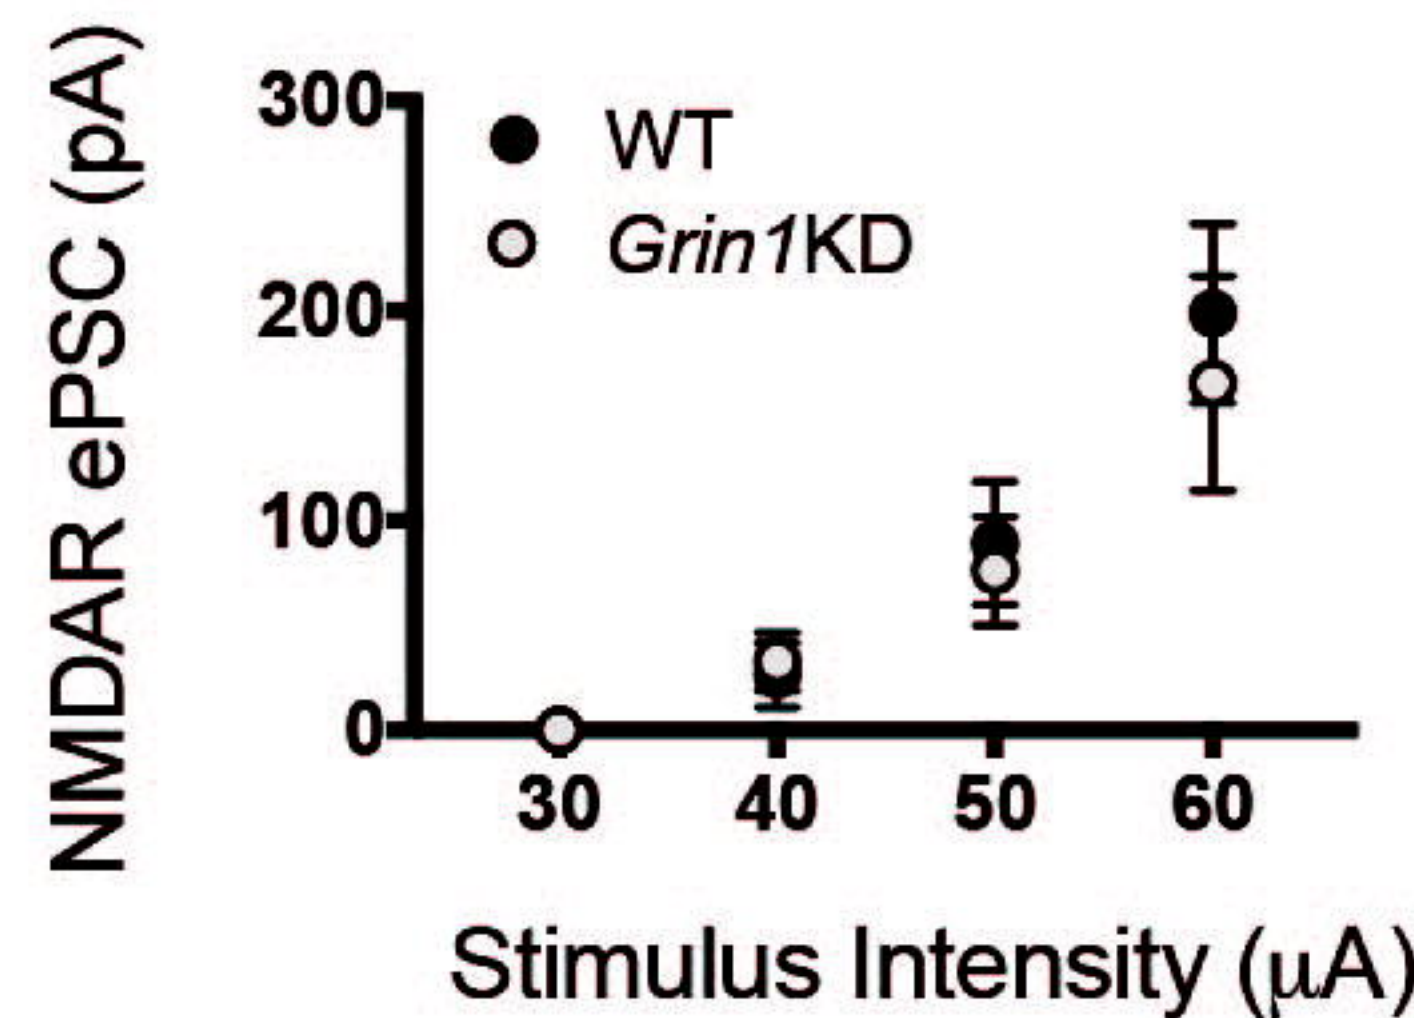



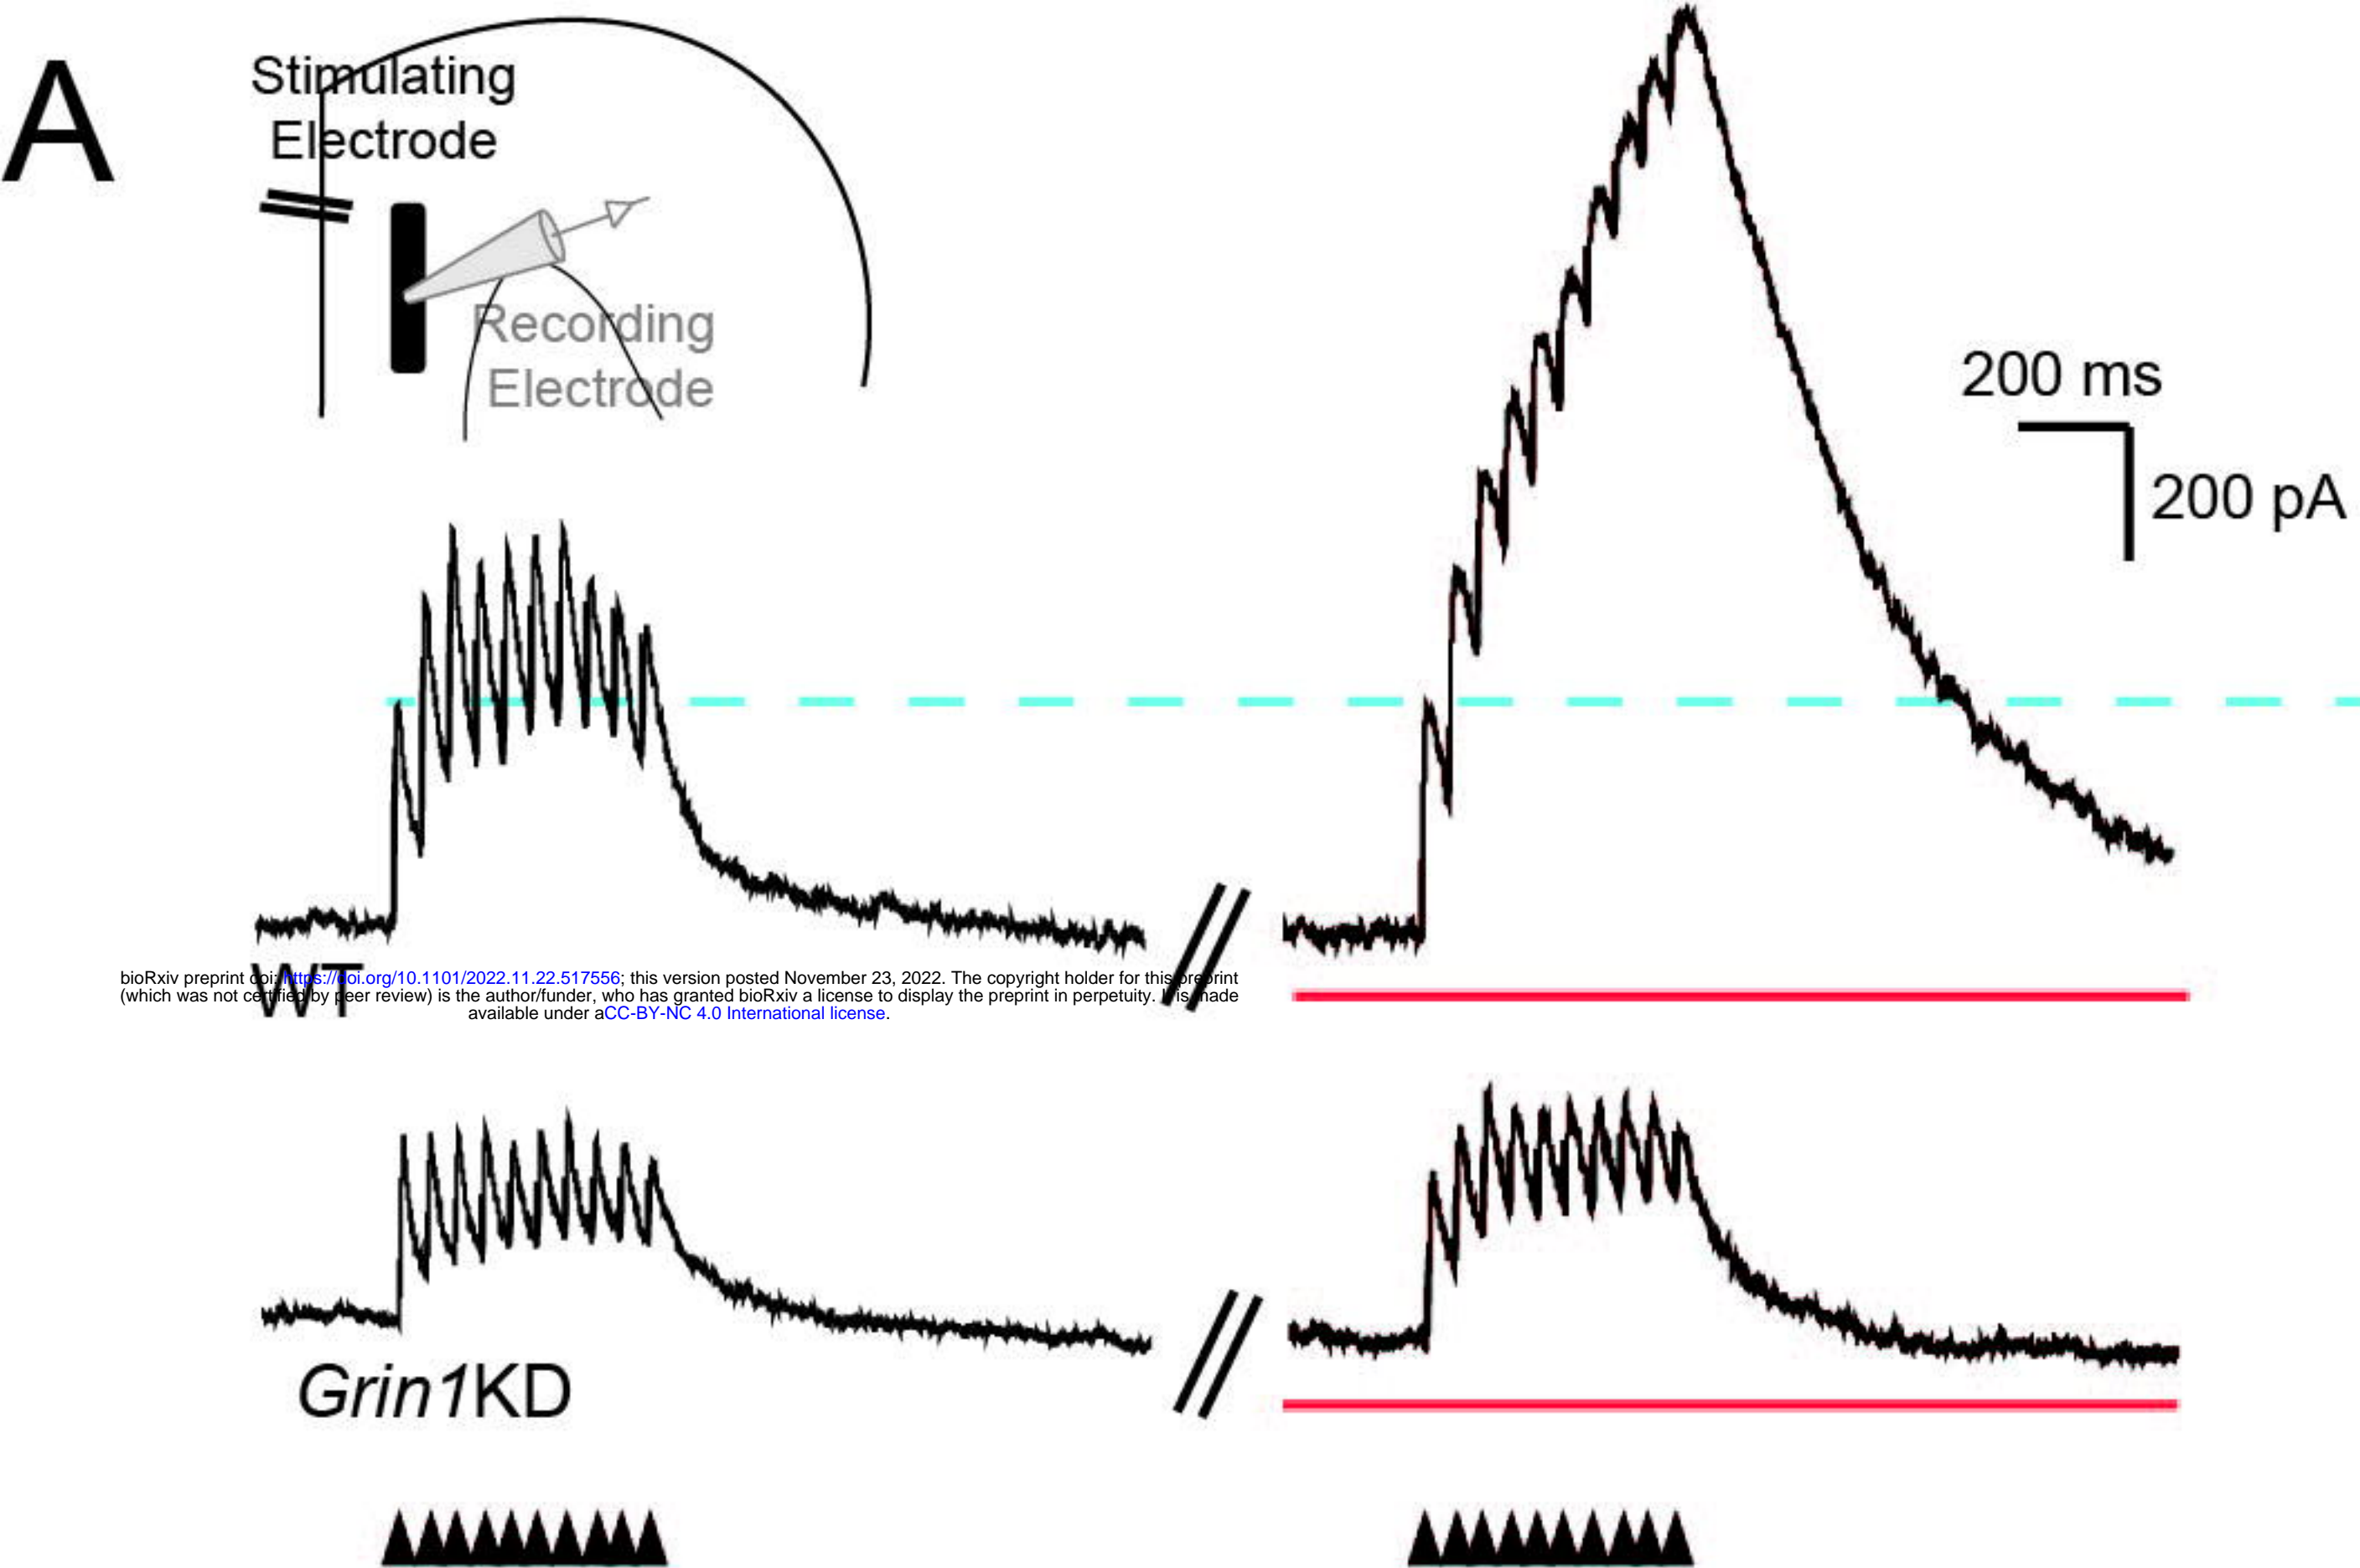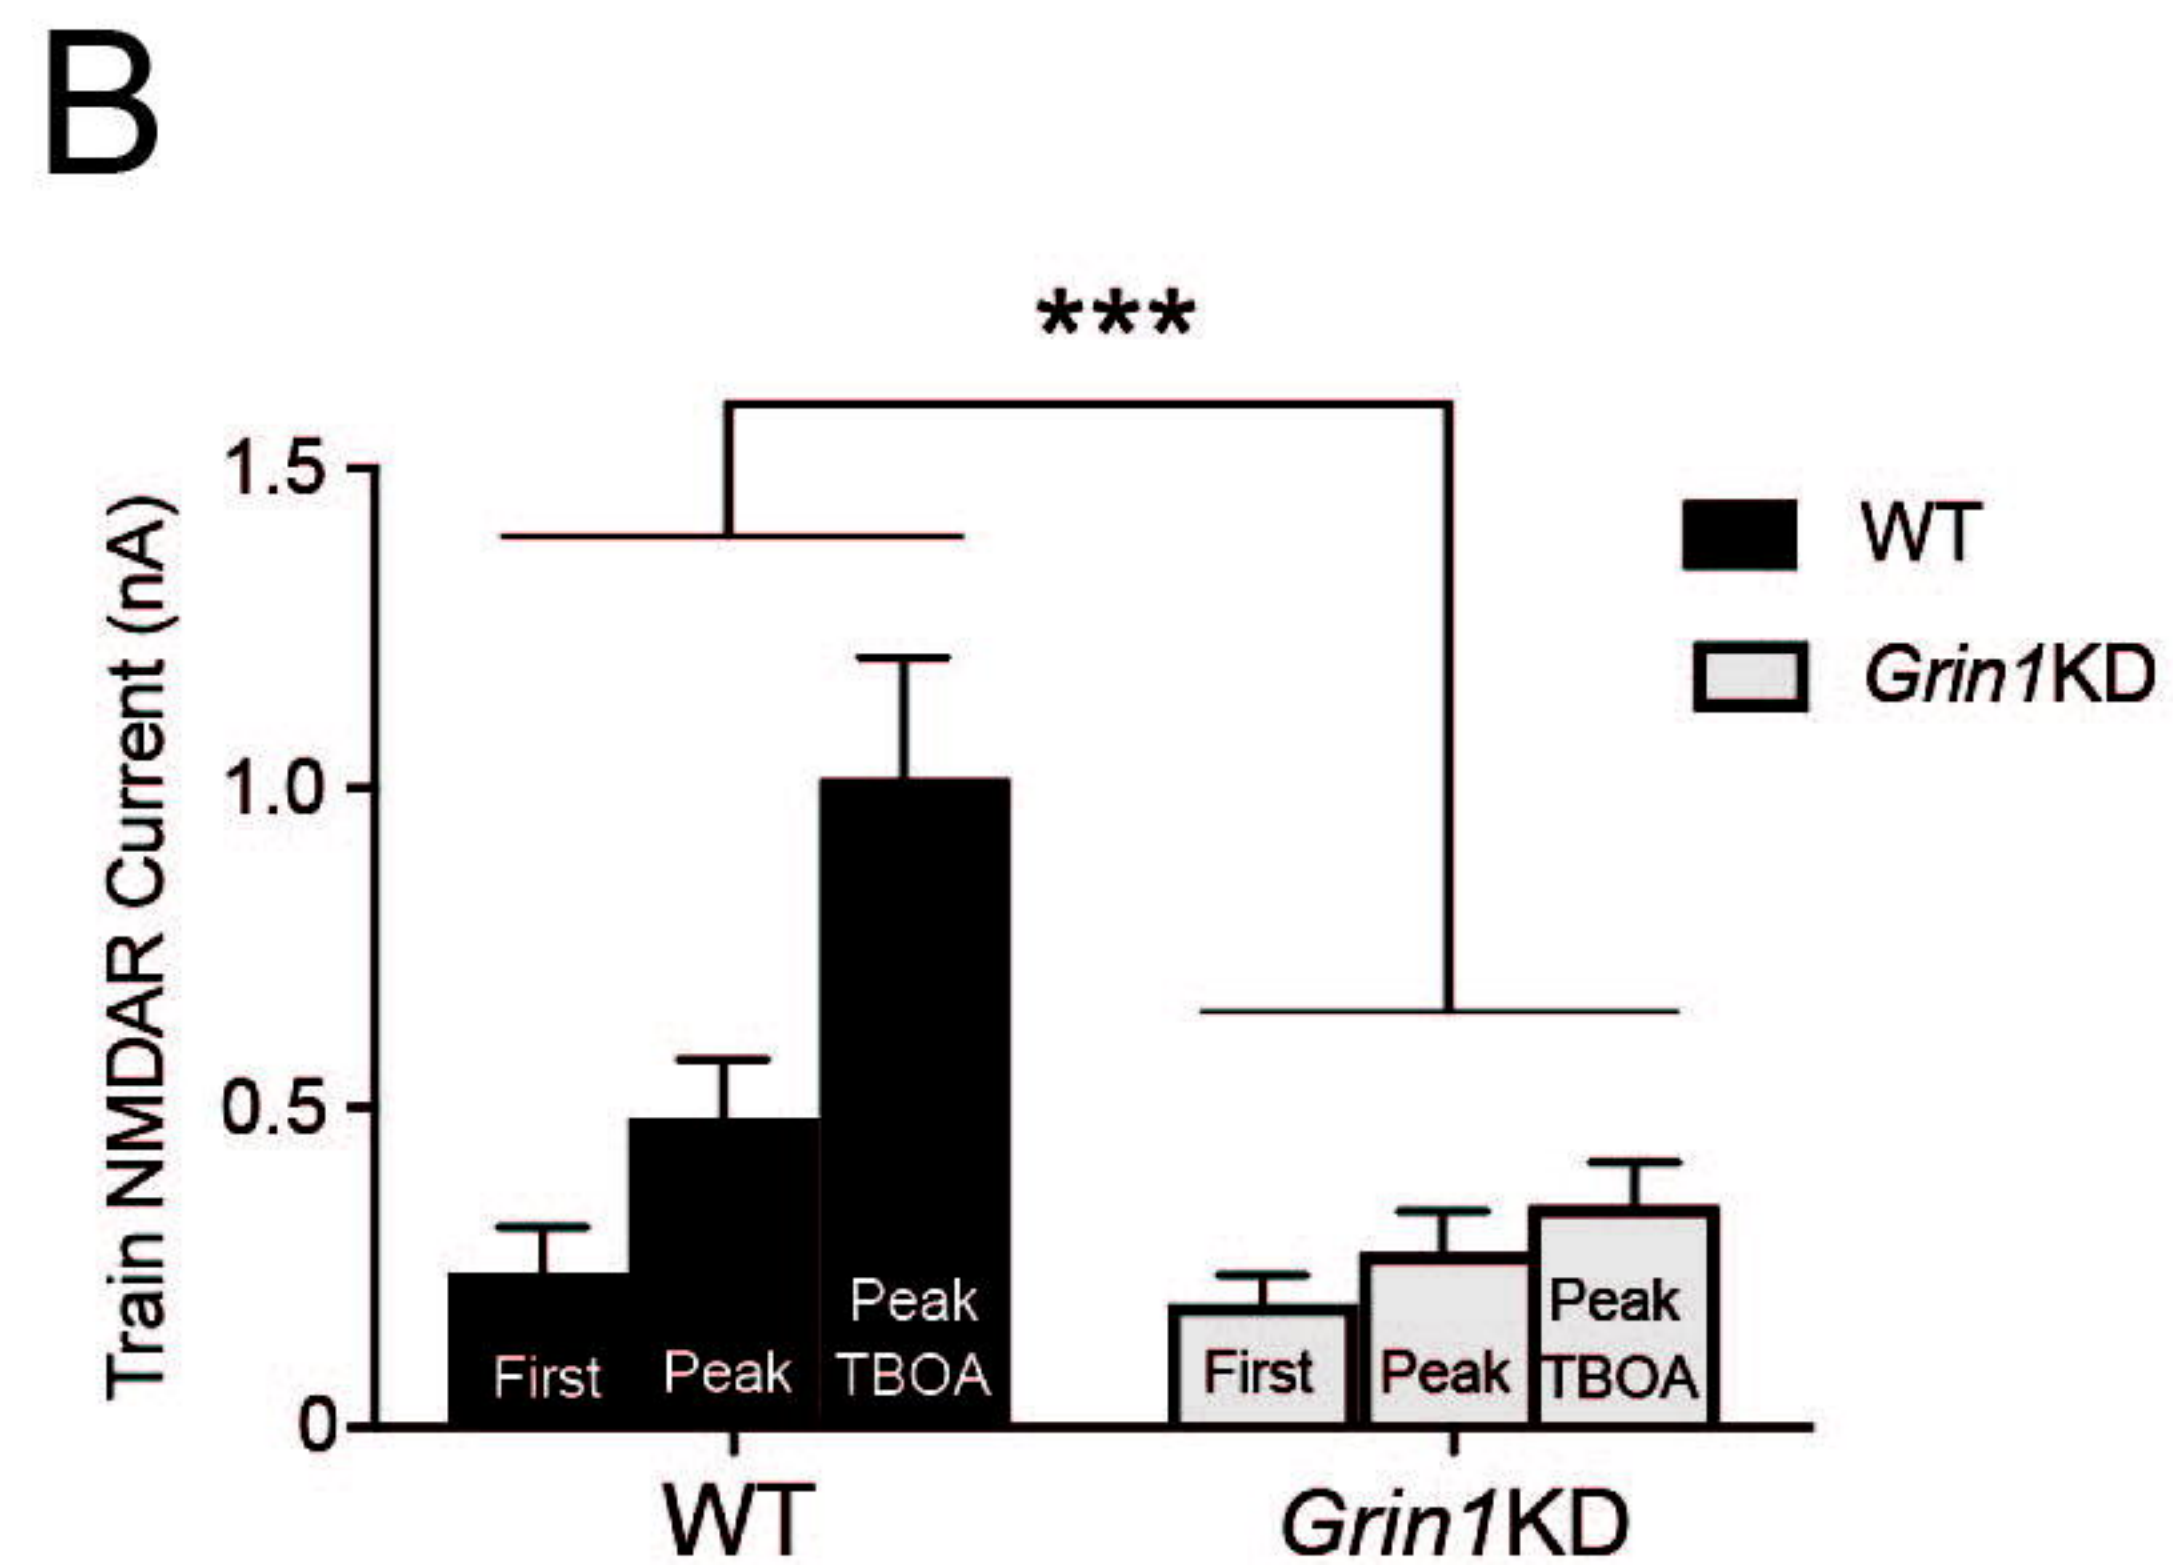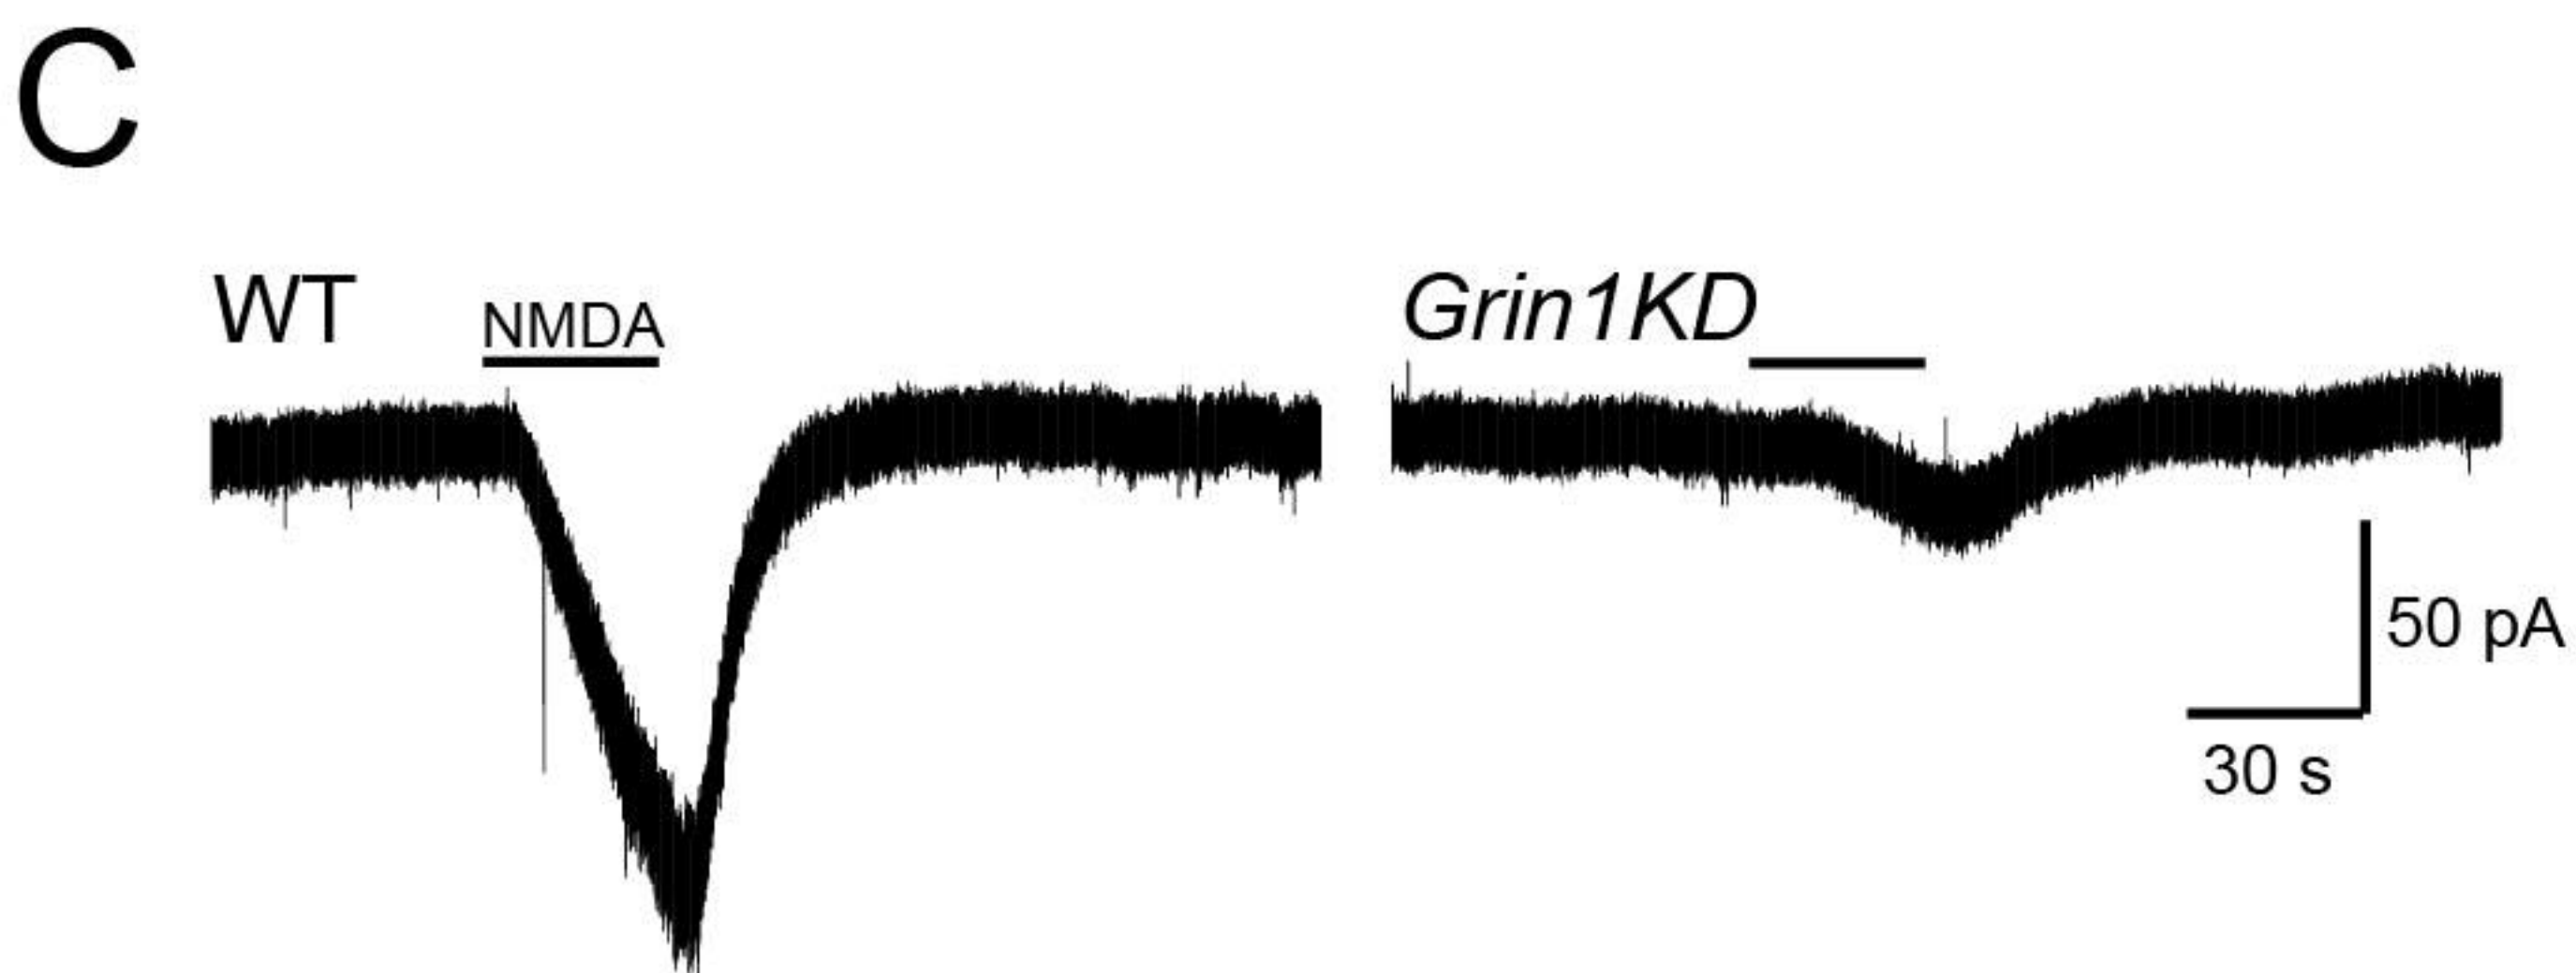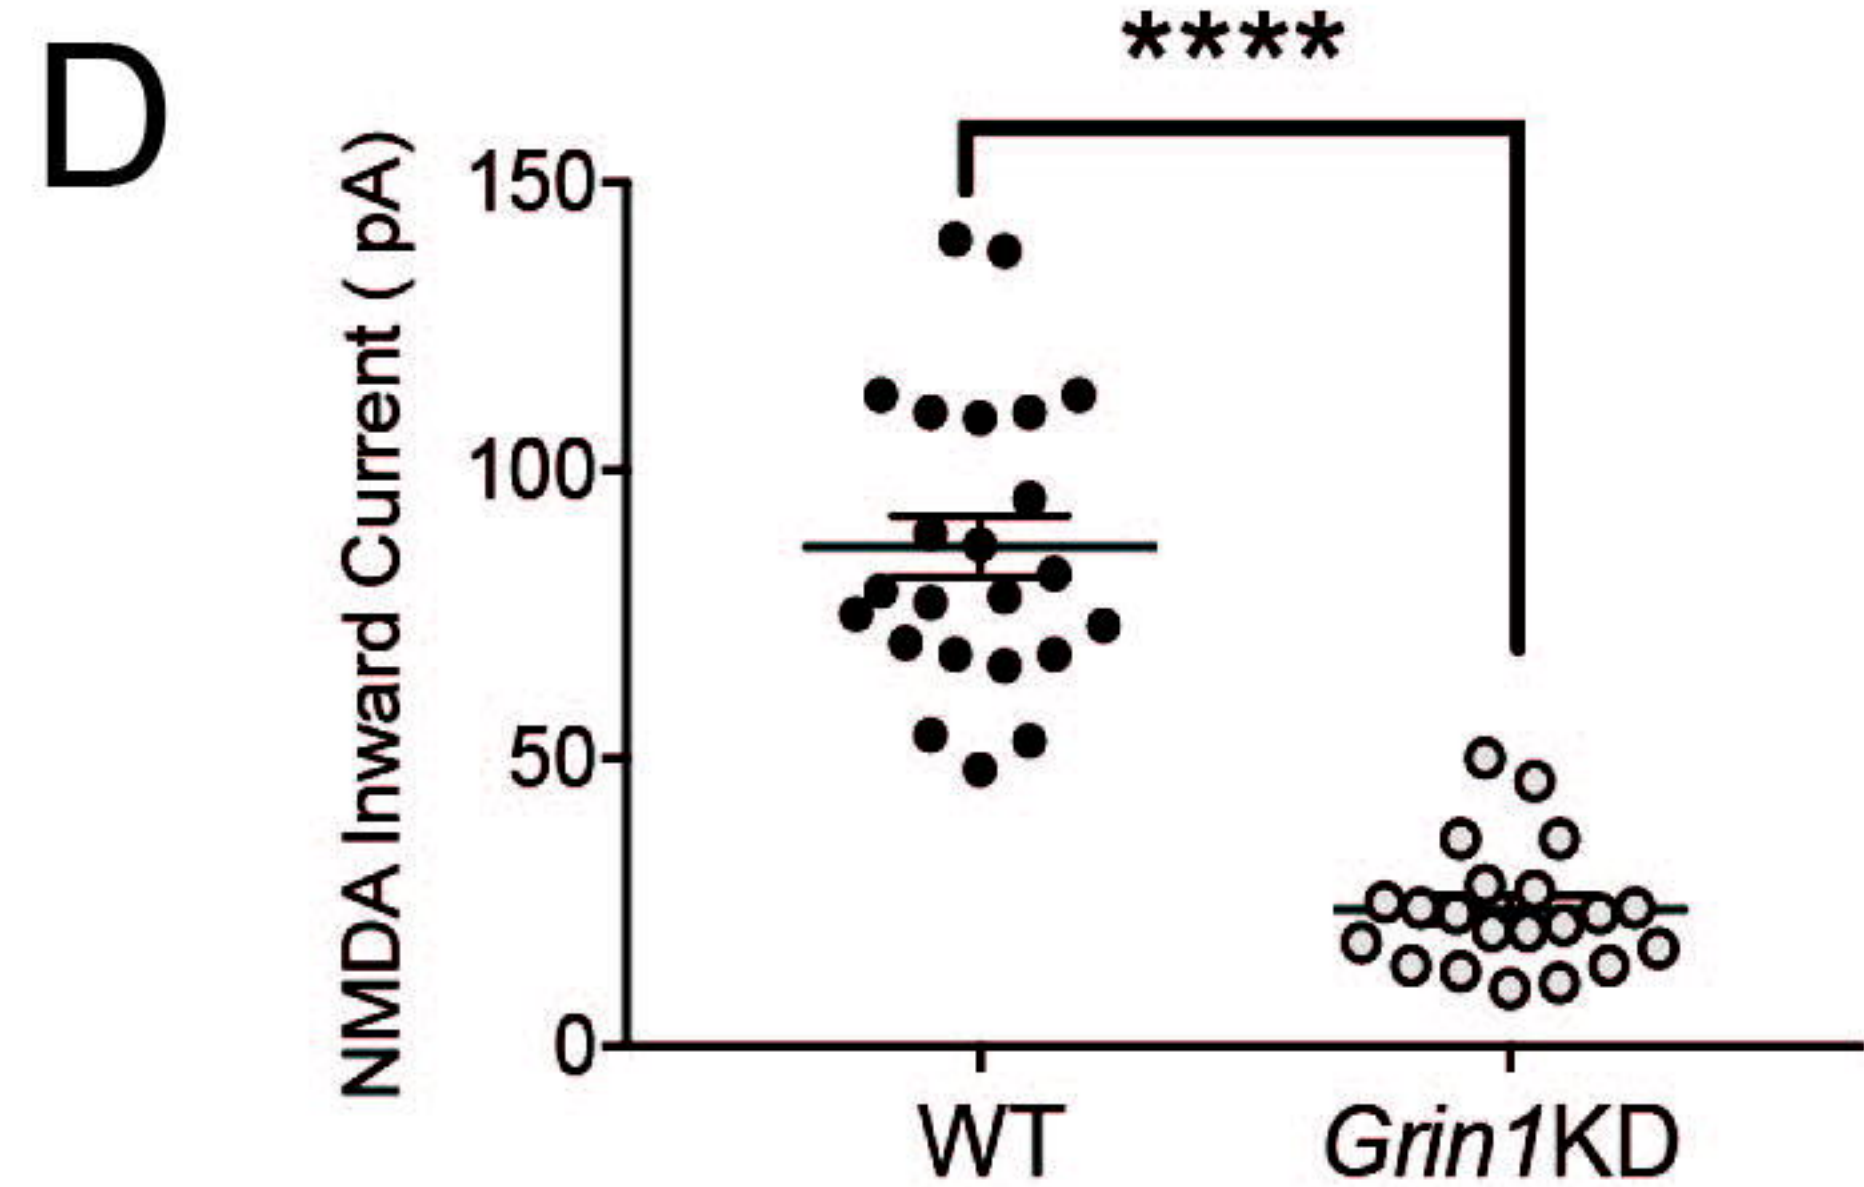



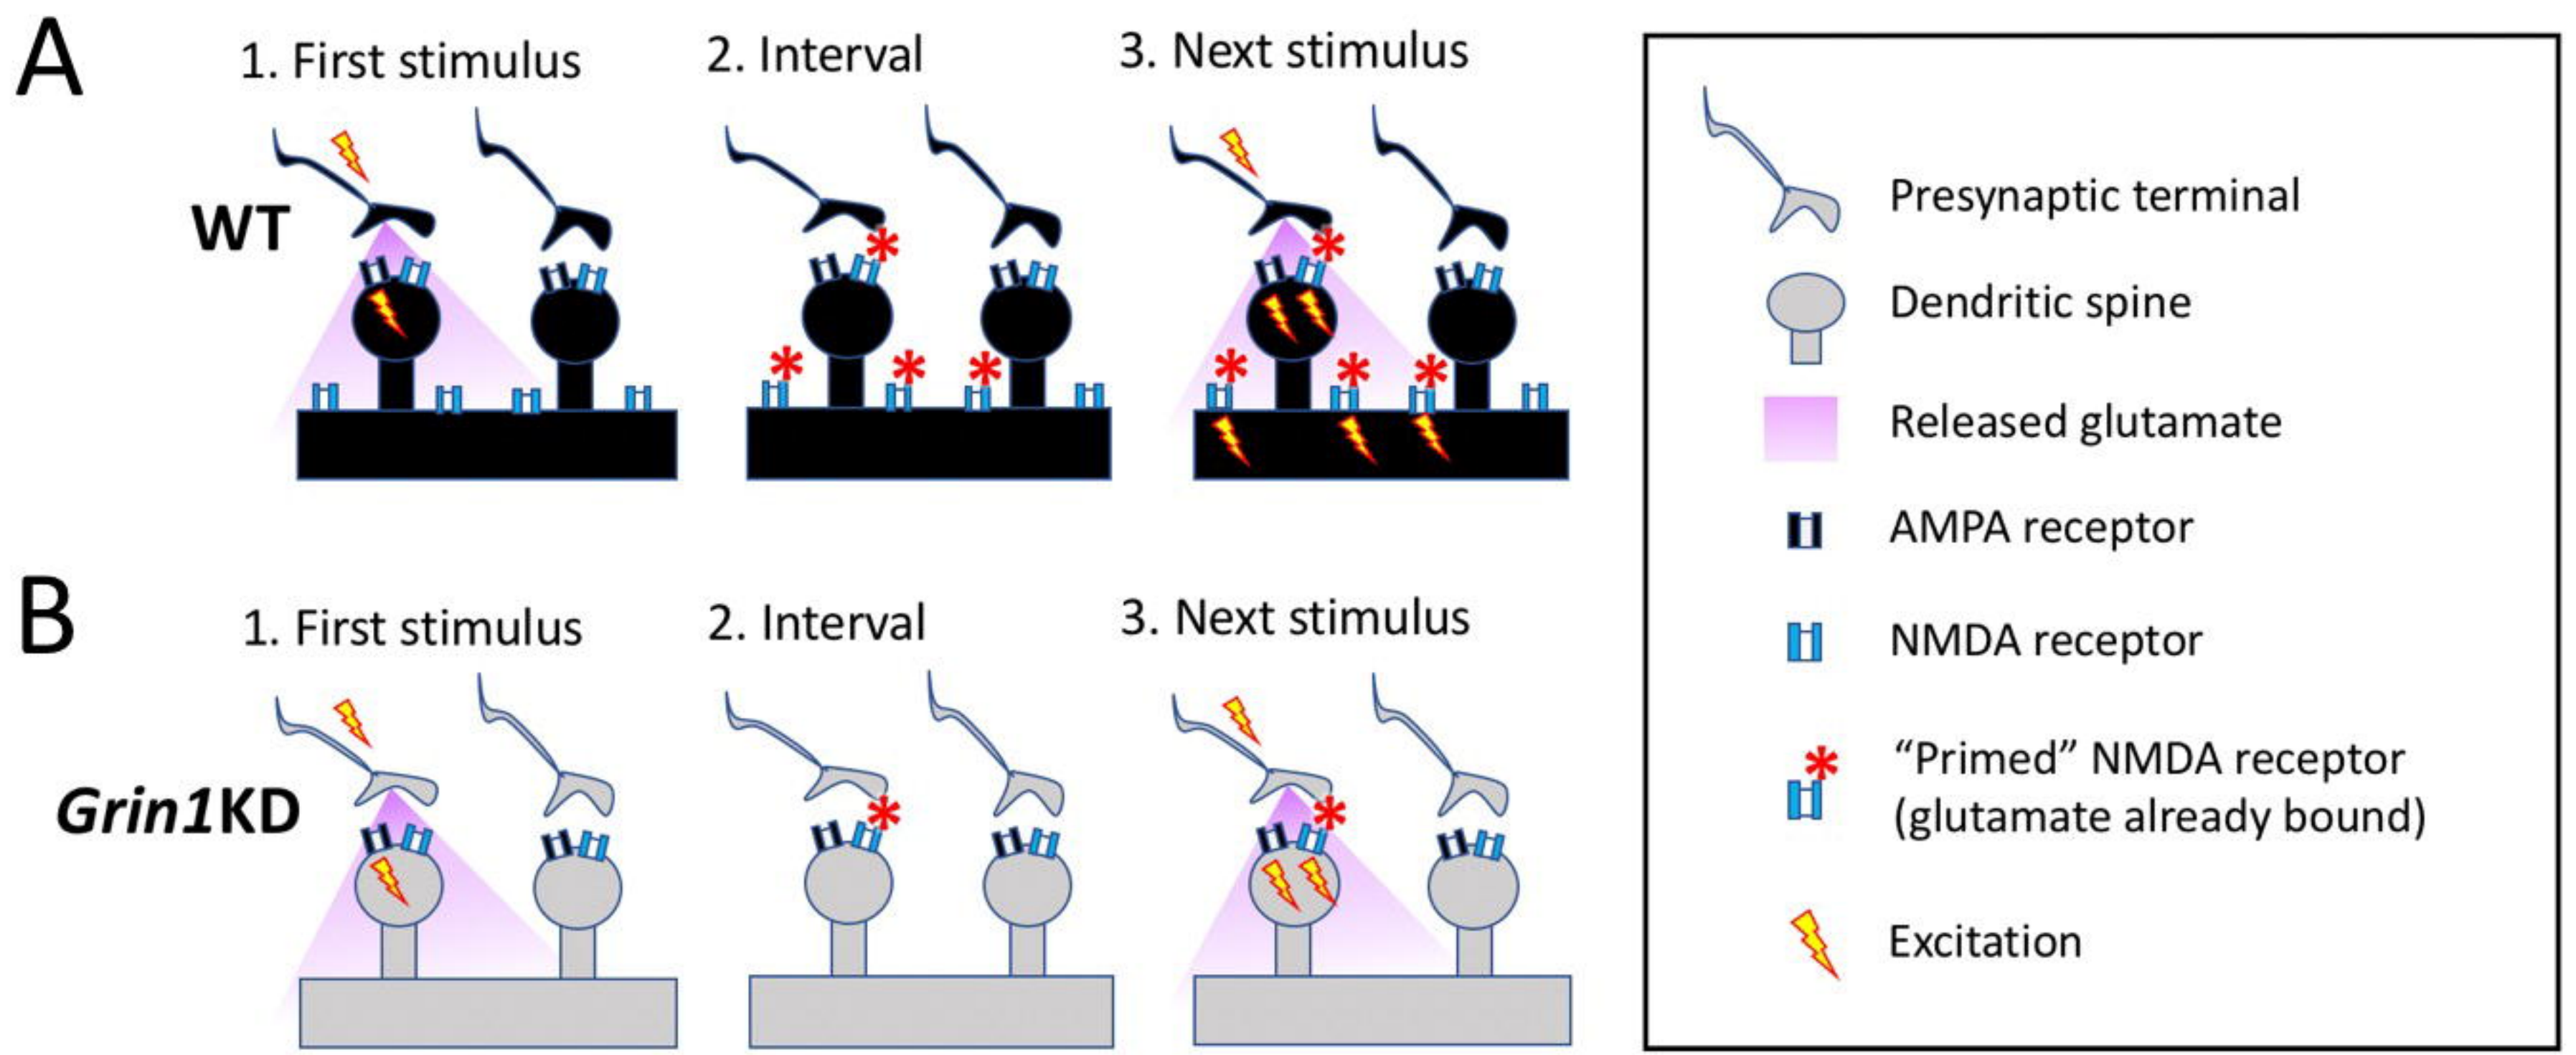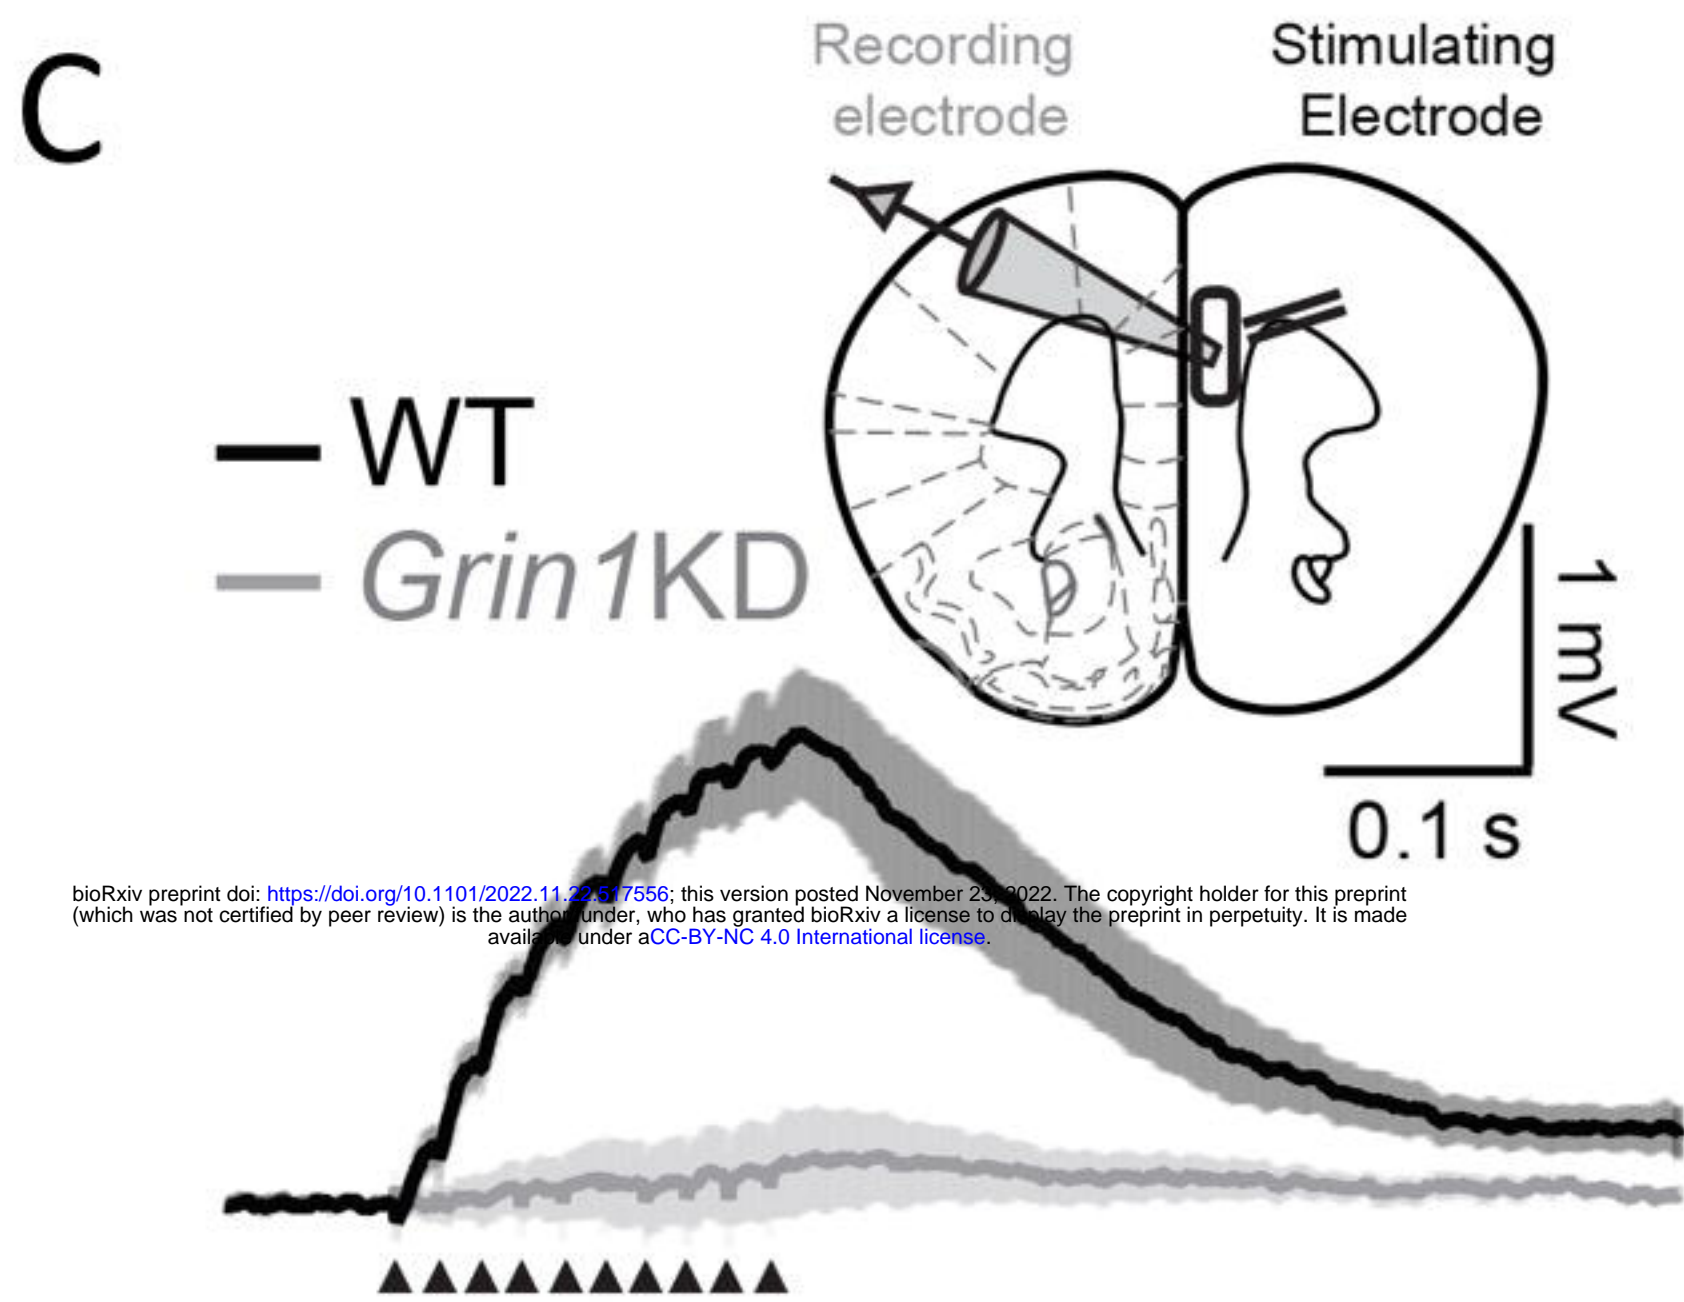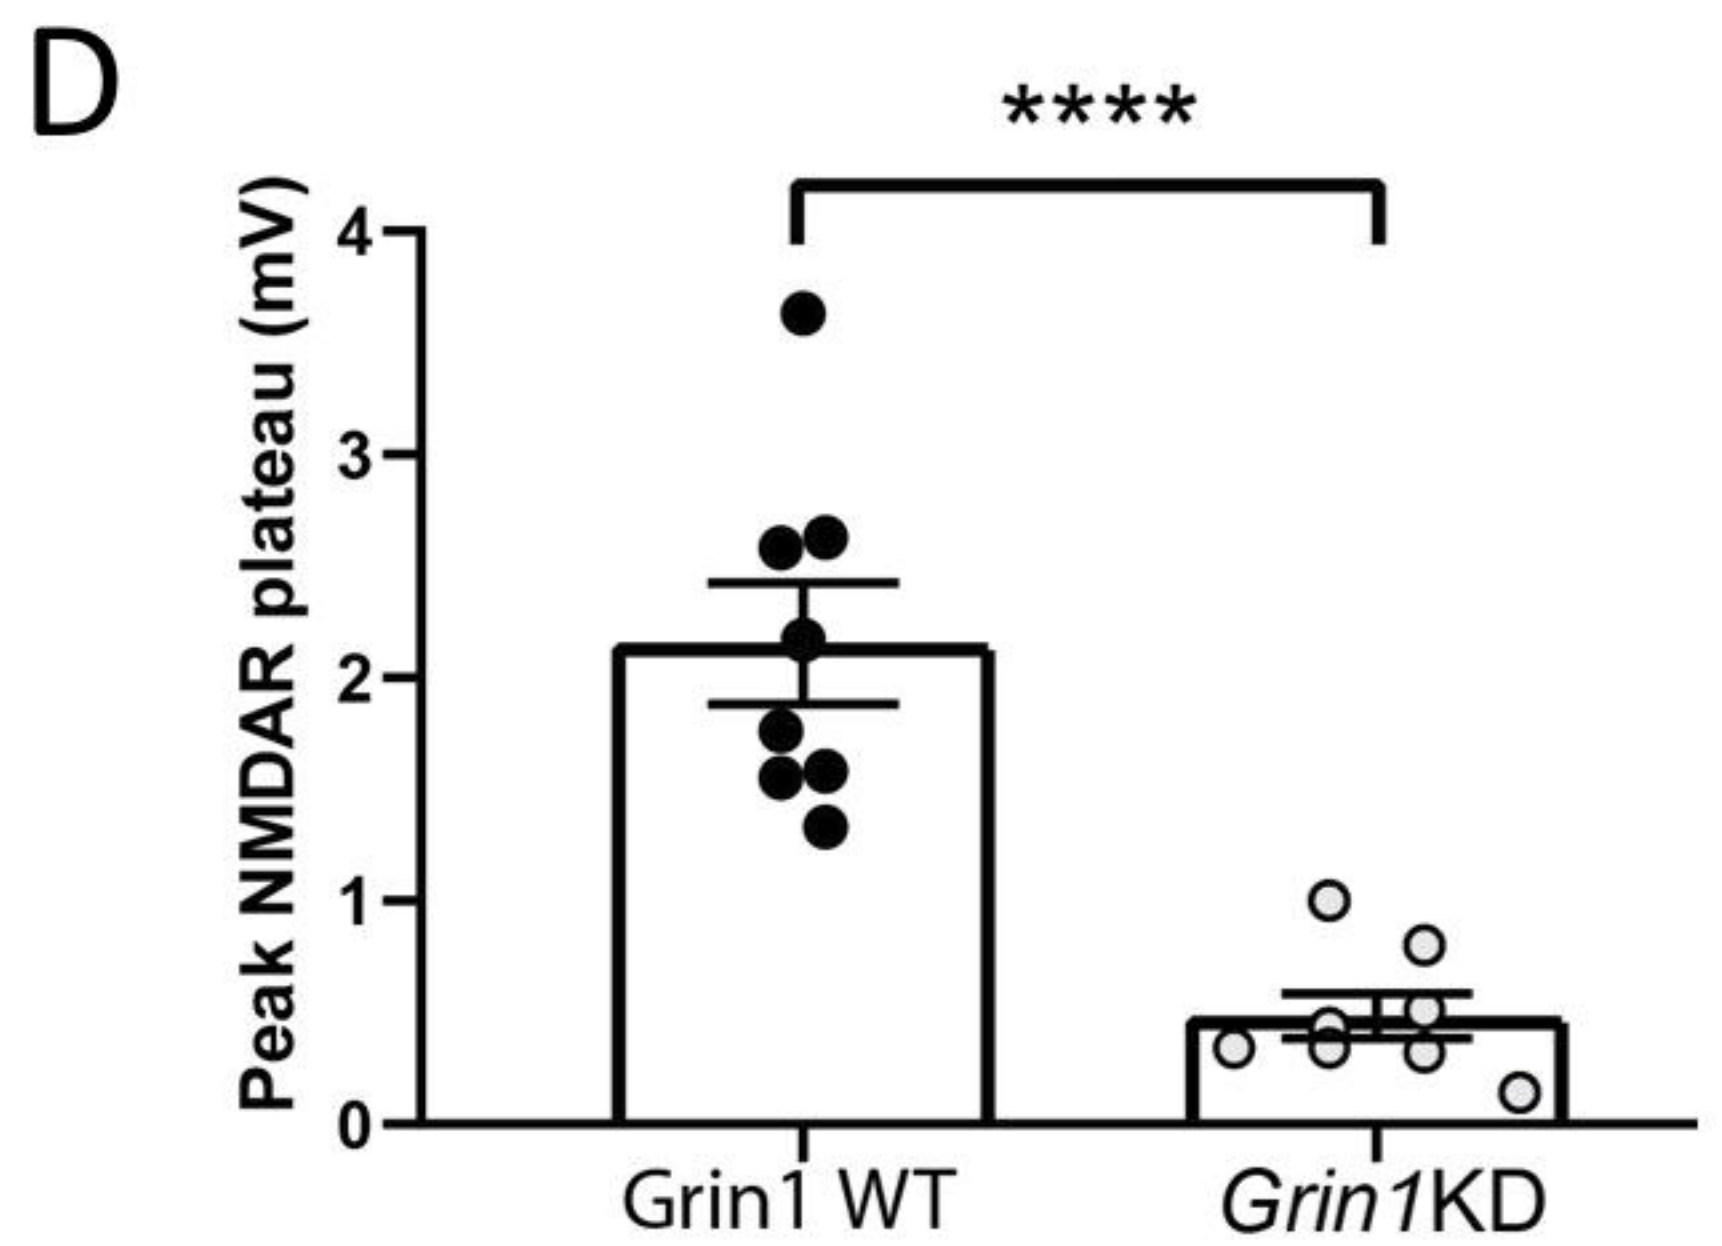



# Floxed *Grin1*KD X Cre-ERT2 mouse

A

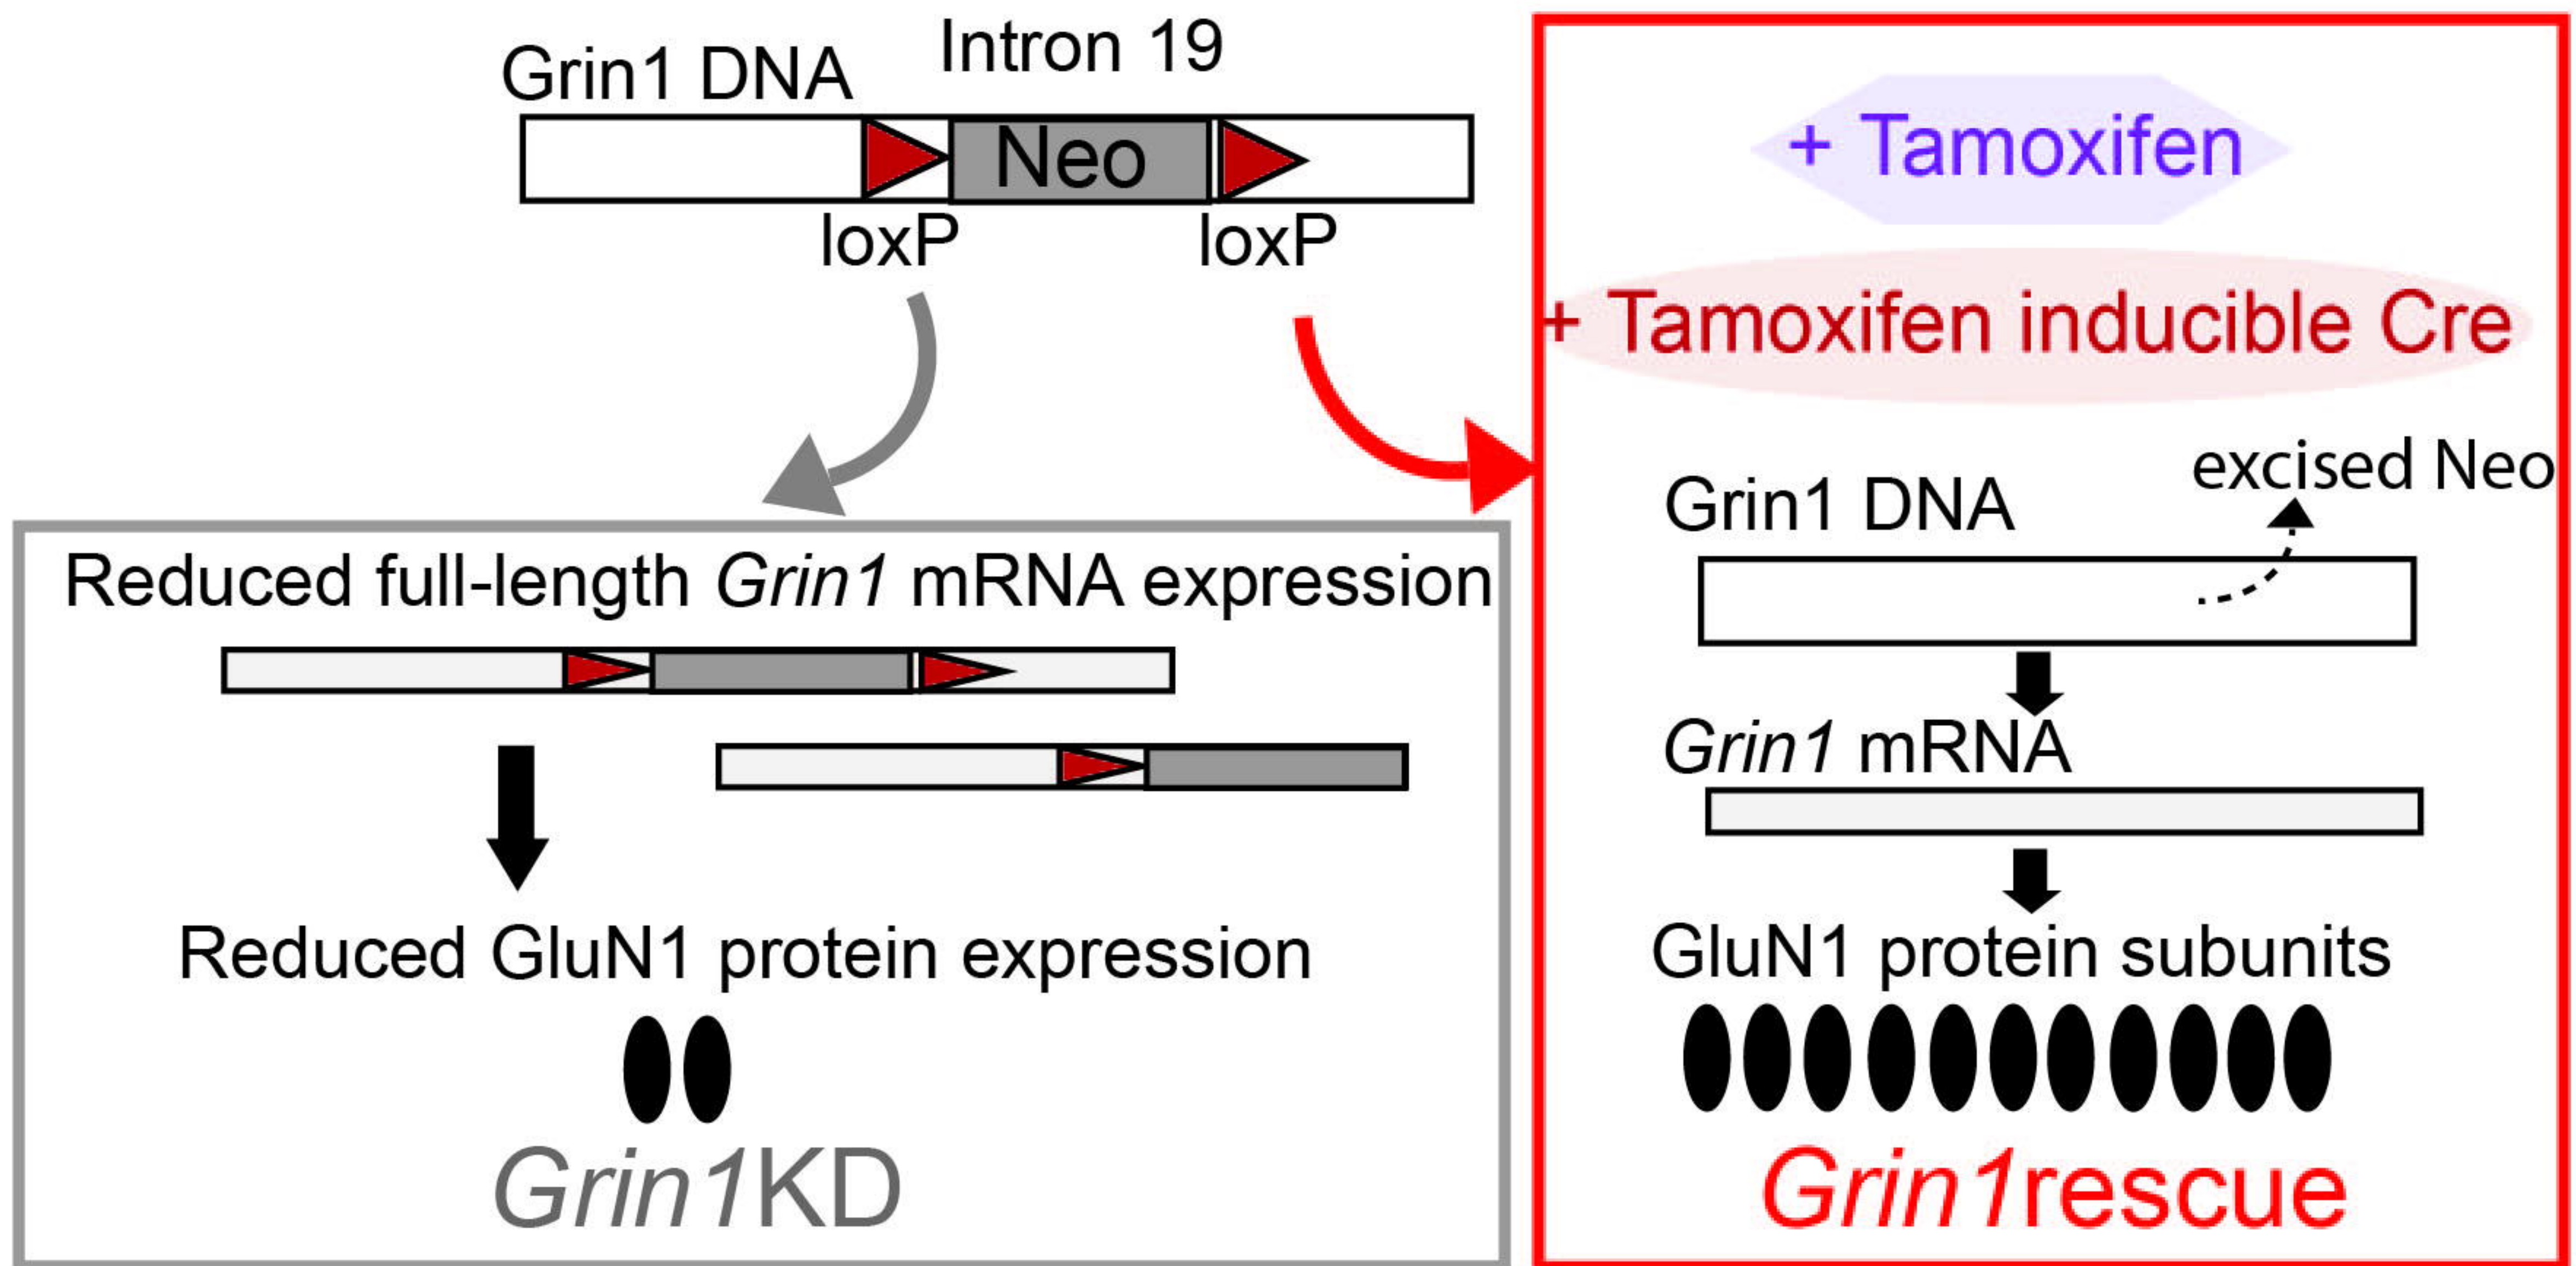

B

WT  
*Grin1*KD  
*Grin1*rescue

bioRxiv preprint doi: <https://doi.org/10.1101/2022.11.22.517556>; this version posted November 23, 2022. The copyright holder for this preprint (which was not certified by peer review) is the author/funder, who has granted bioRxiv a license to display the preprint in perpetuity. It is made available under aCC-BY-NC 4.0 International license.

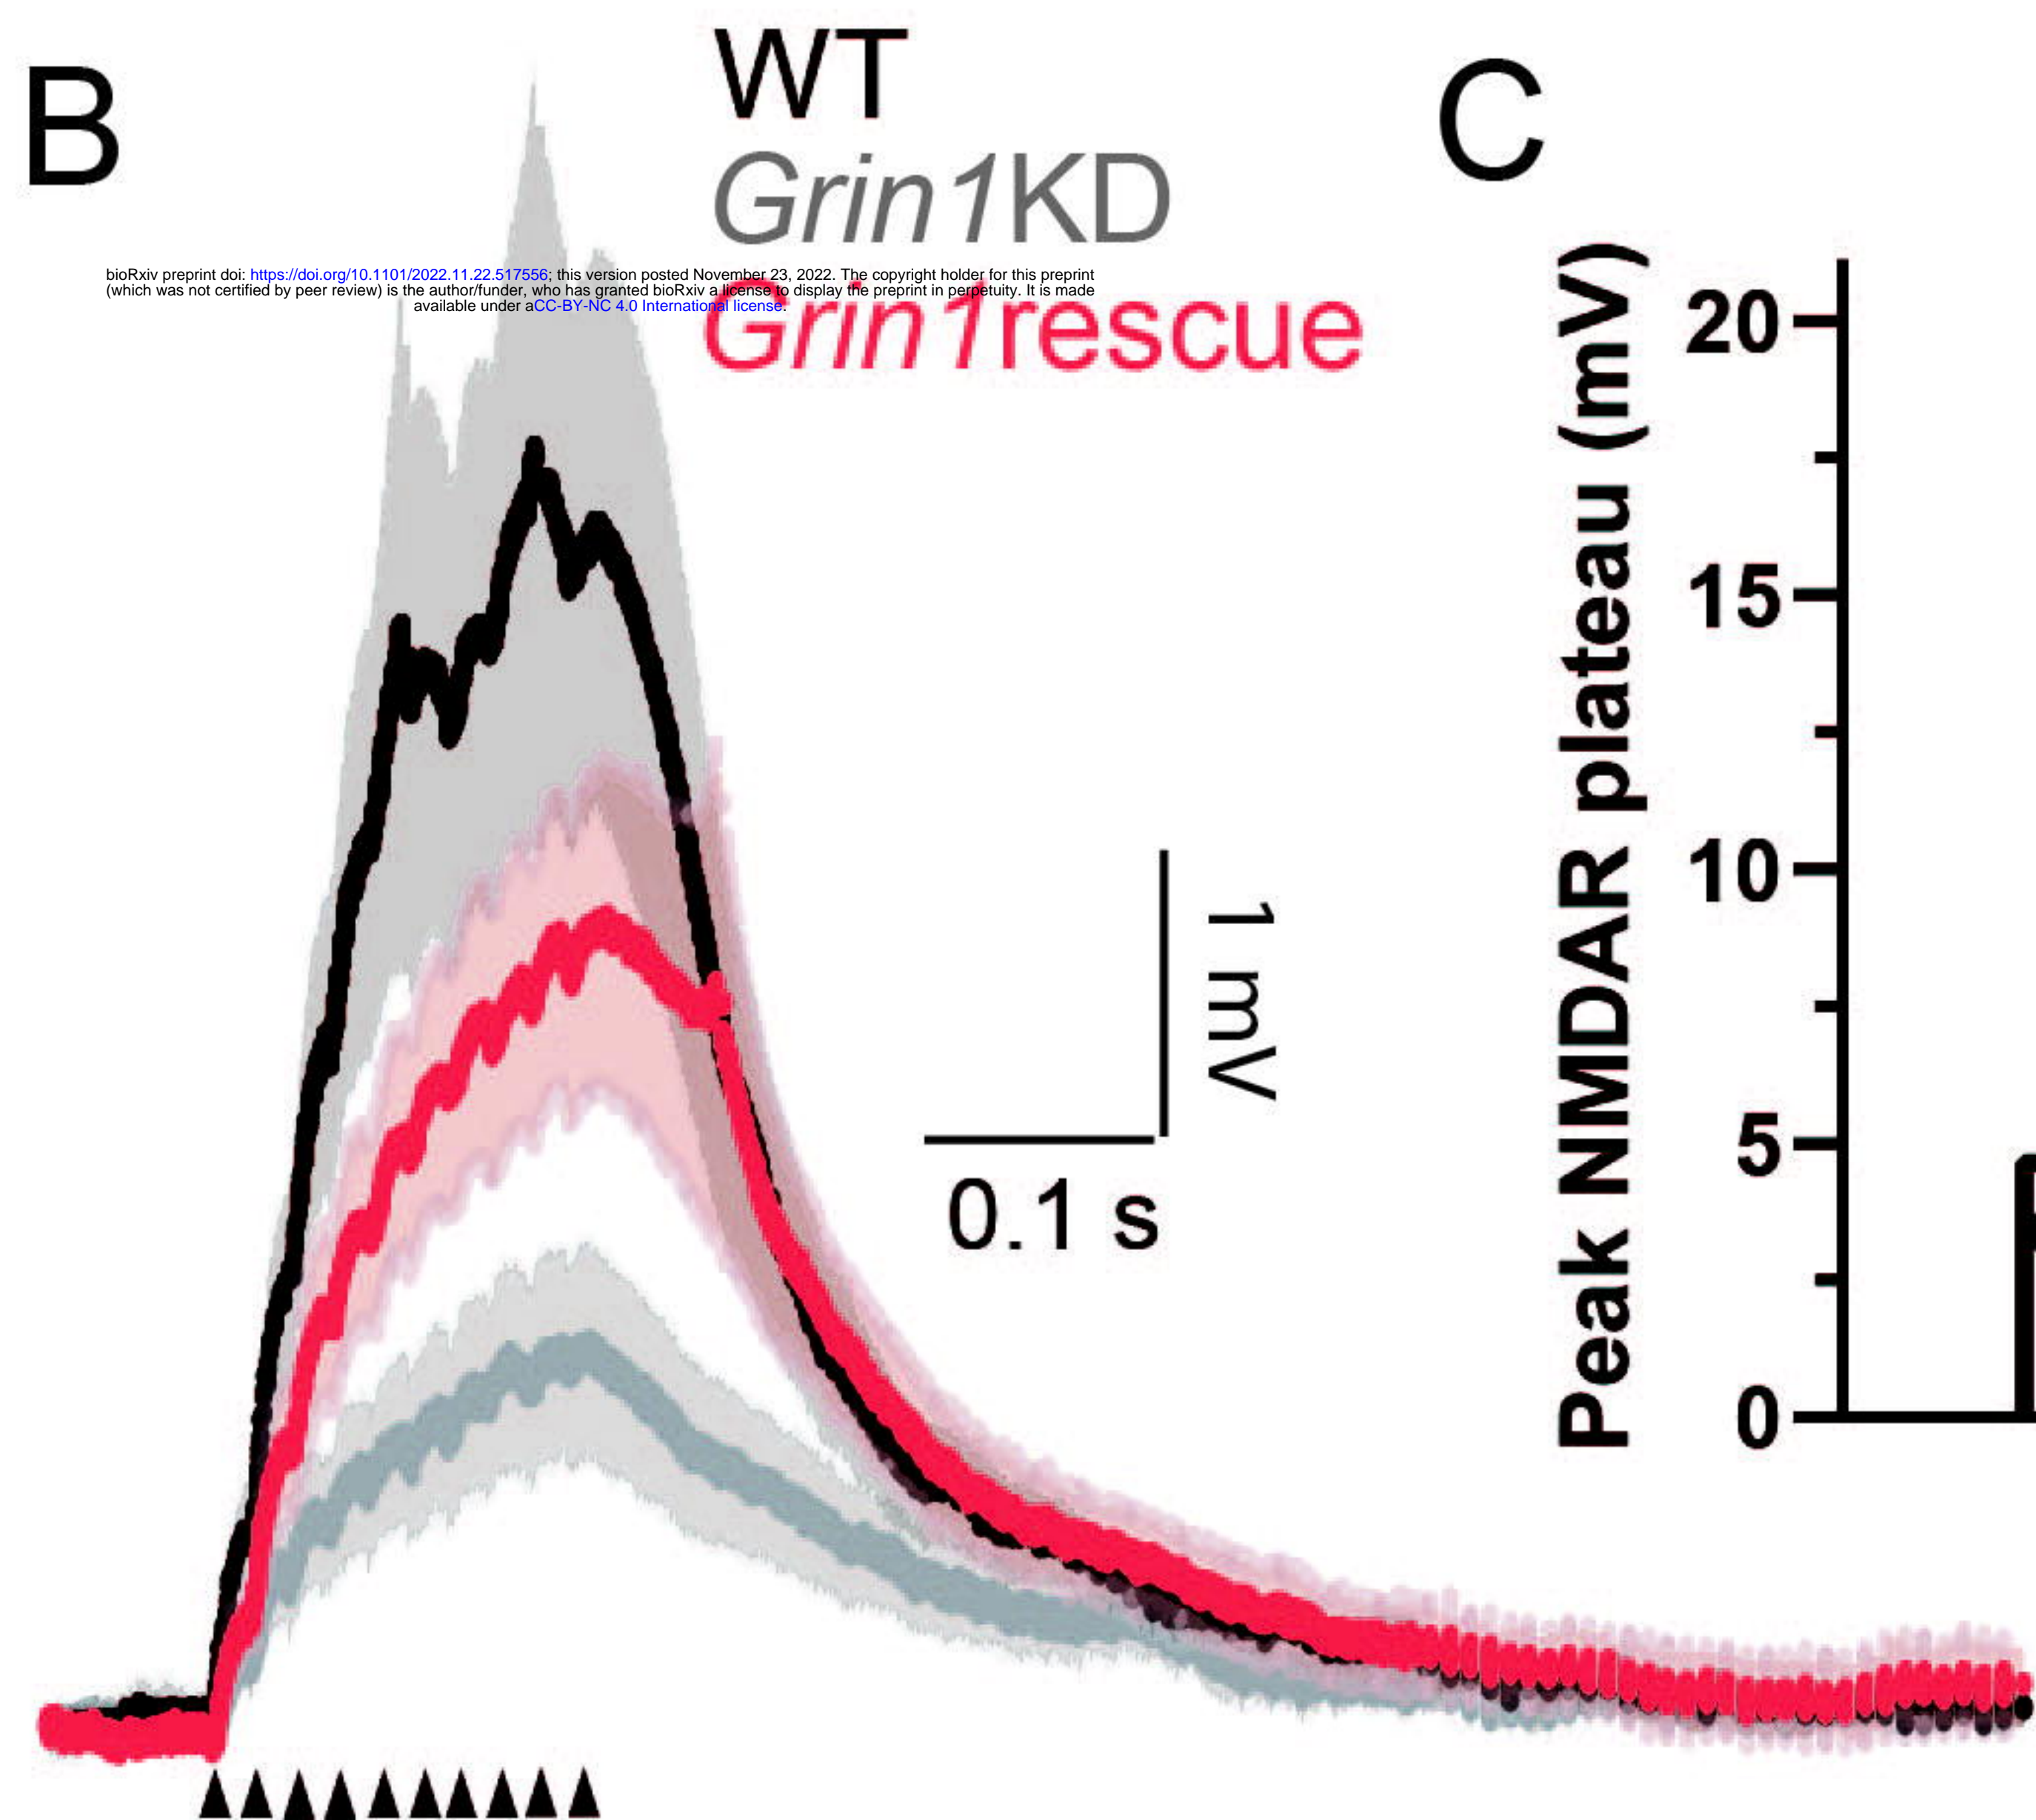

C

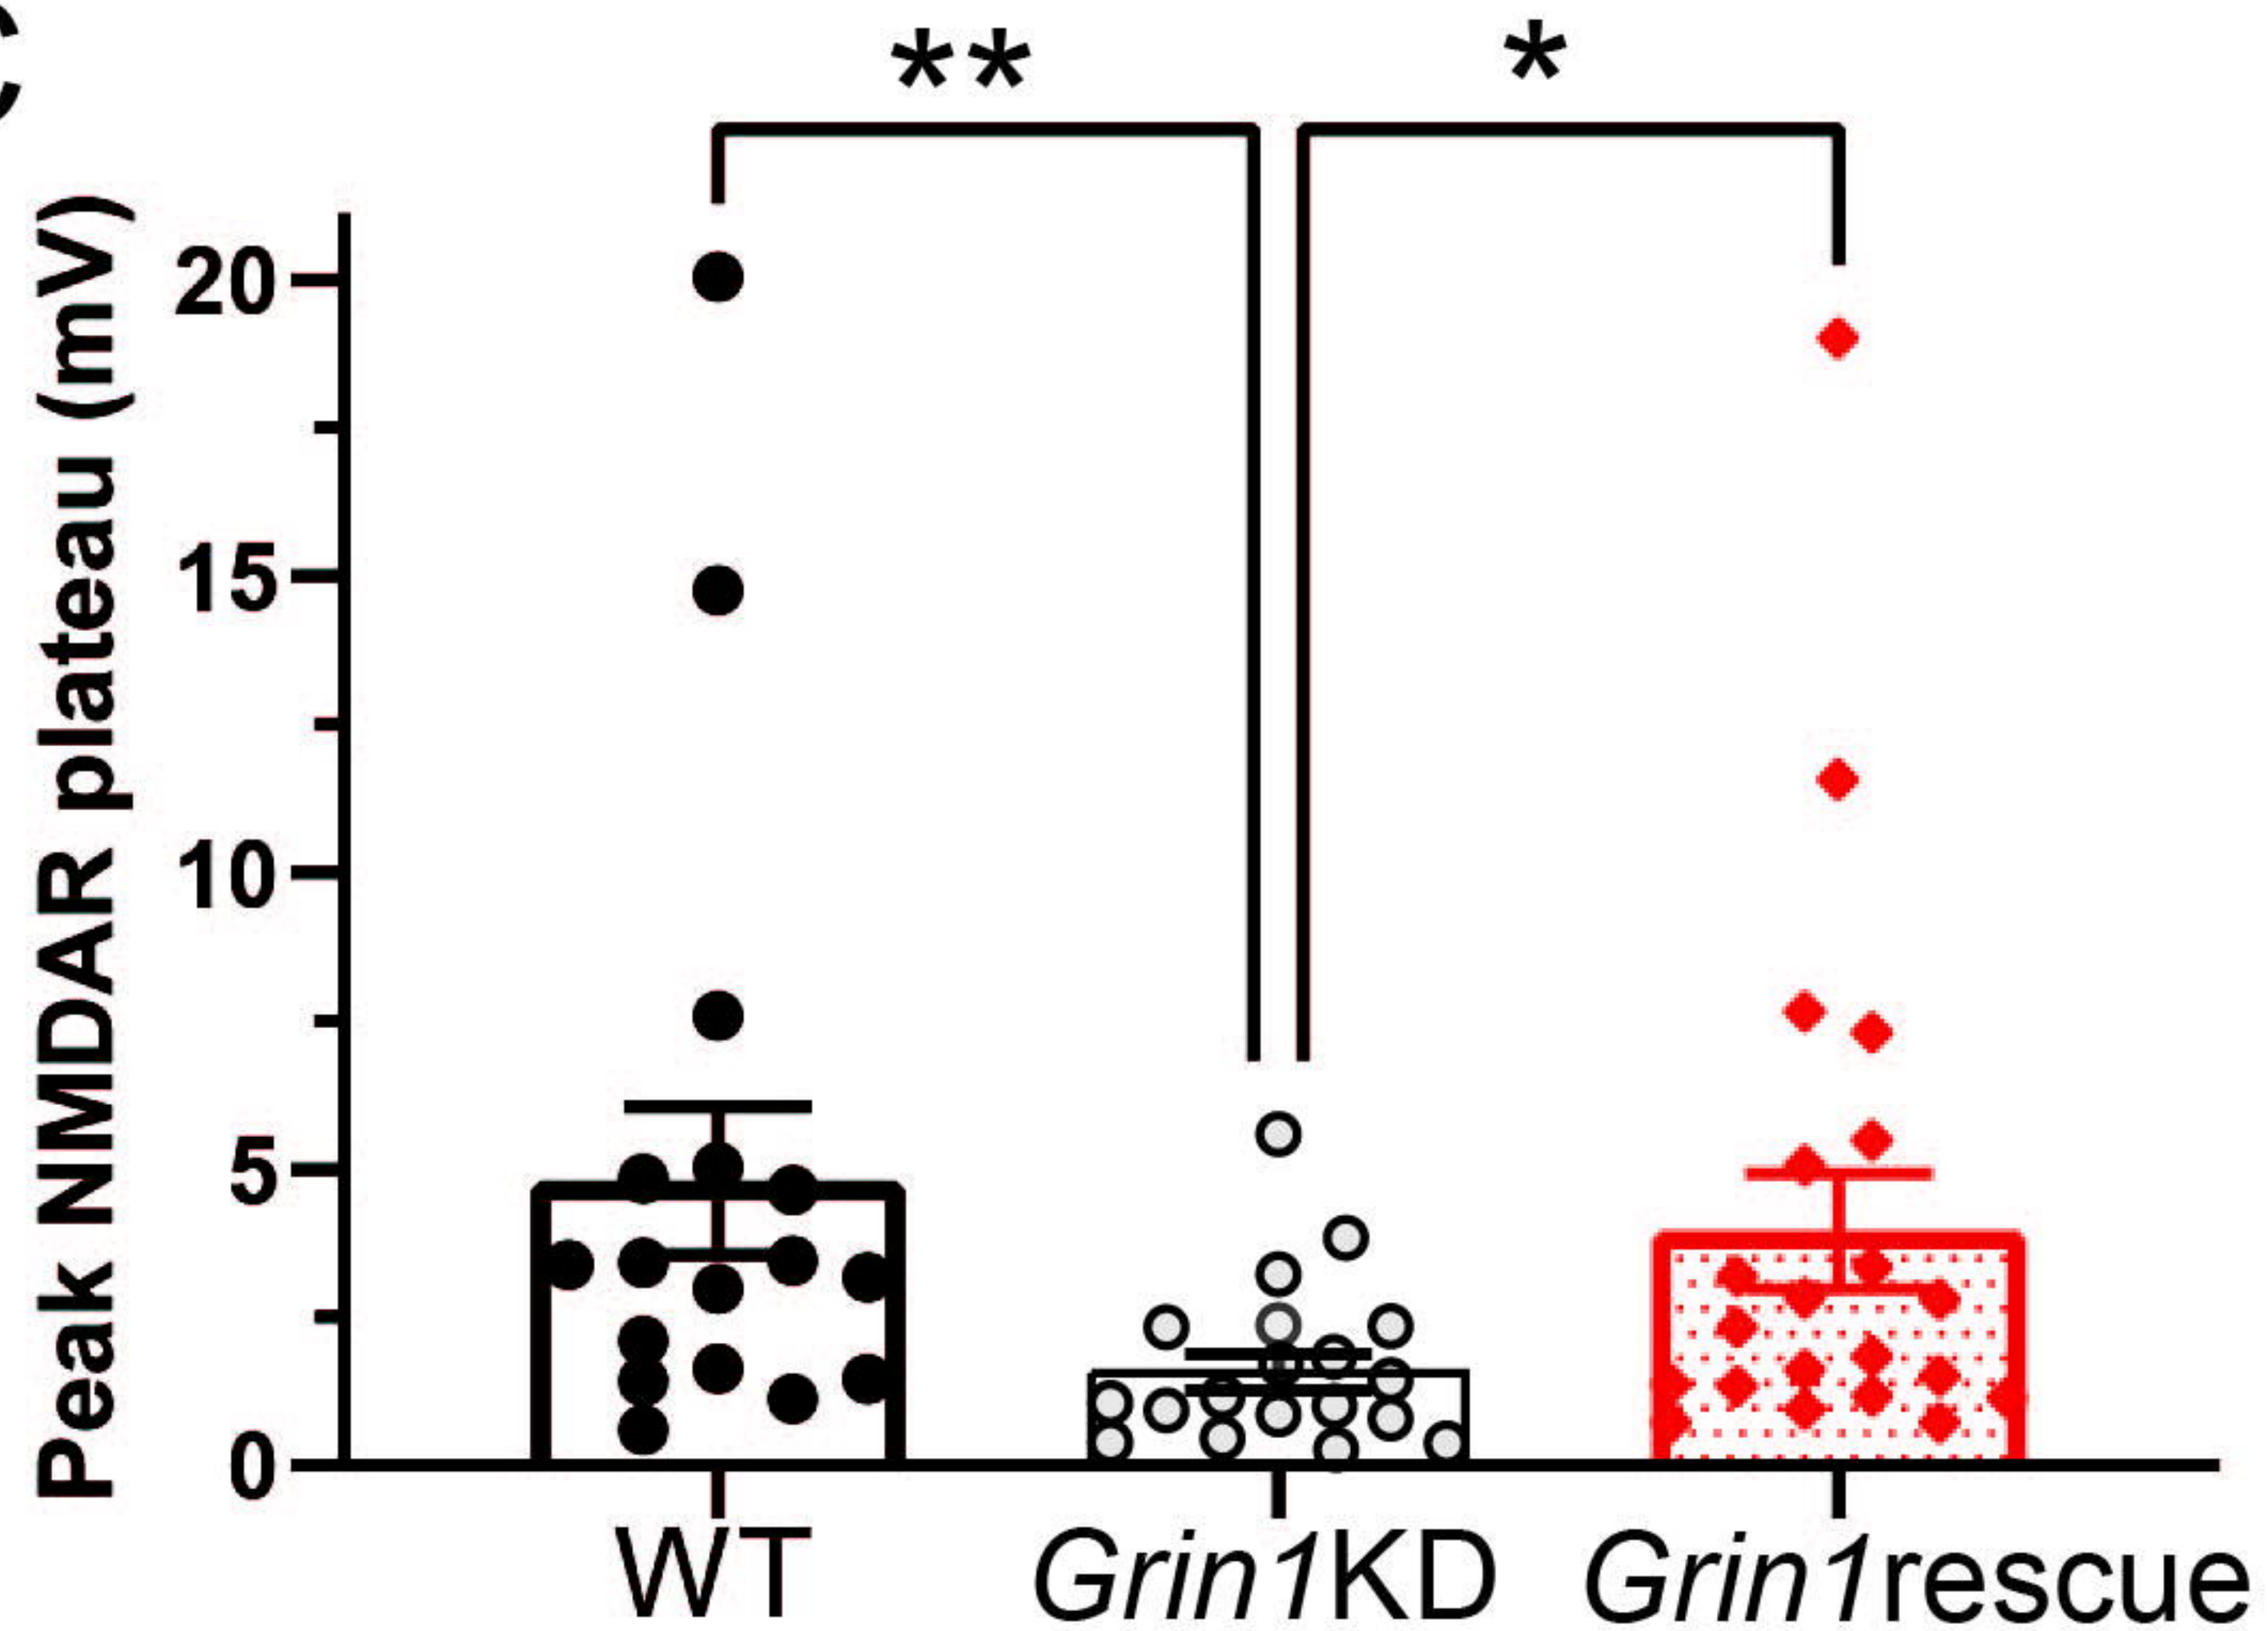



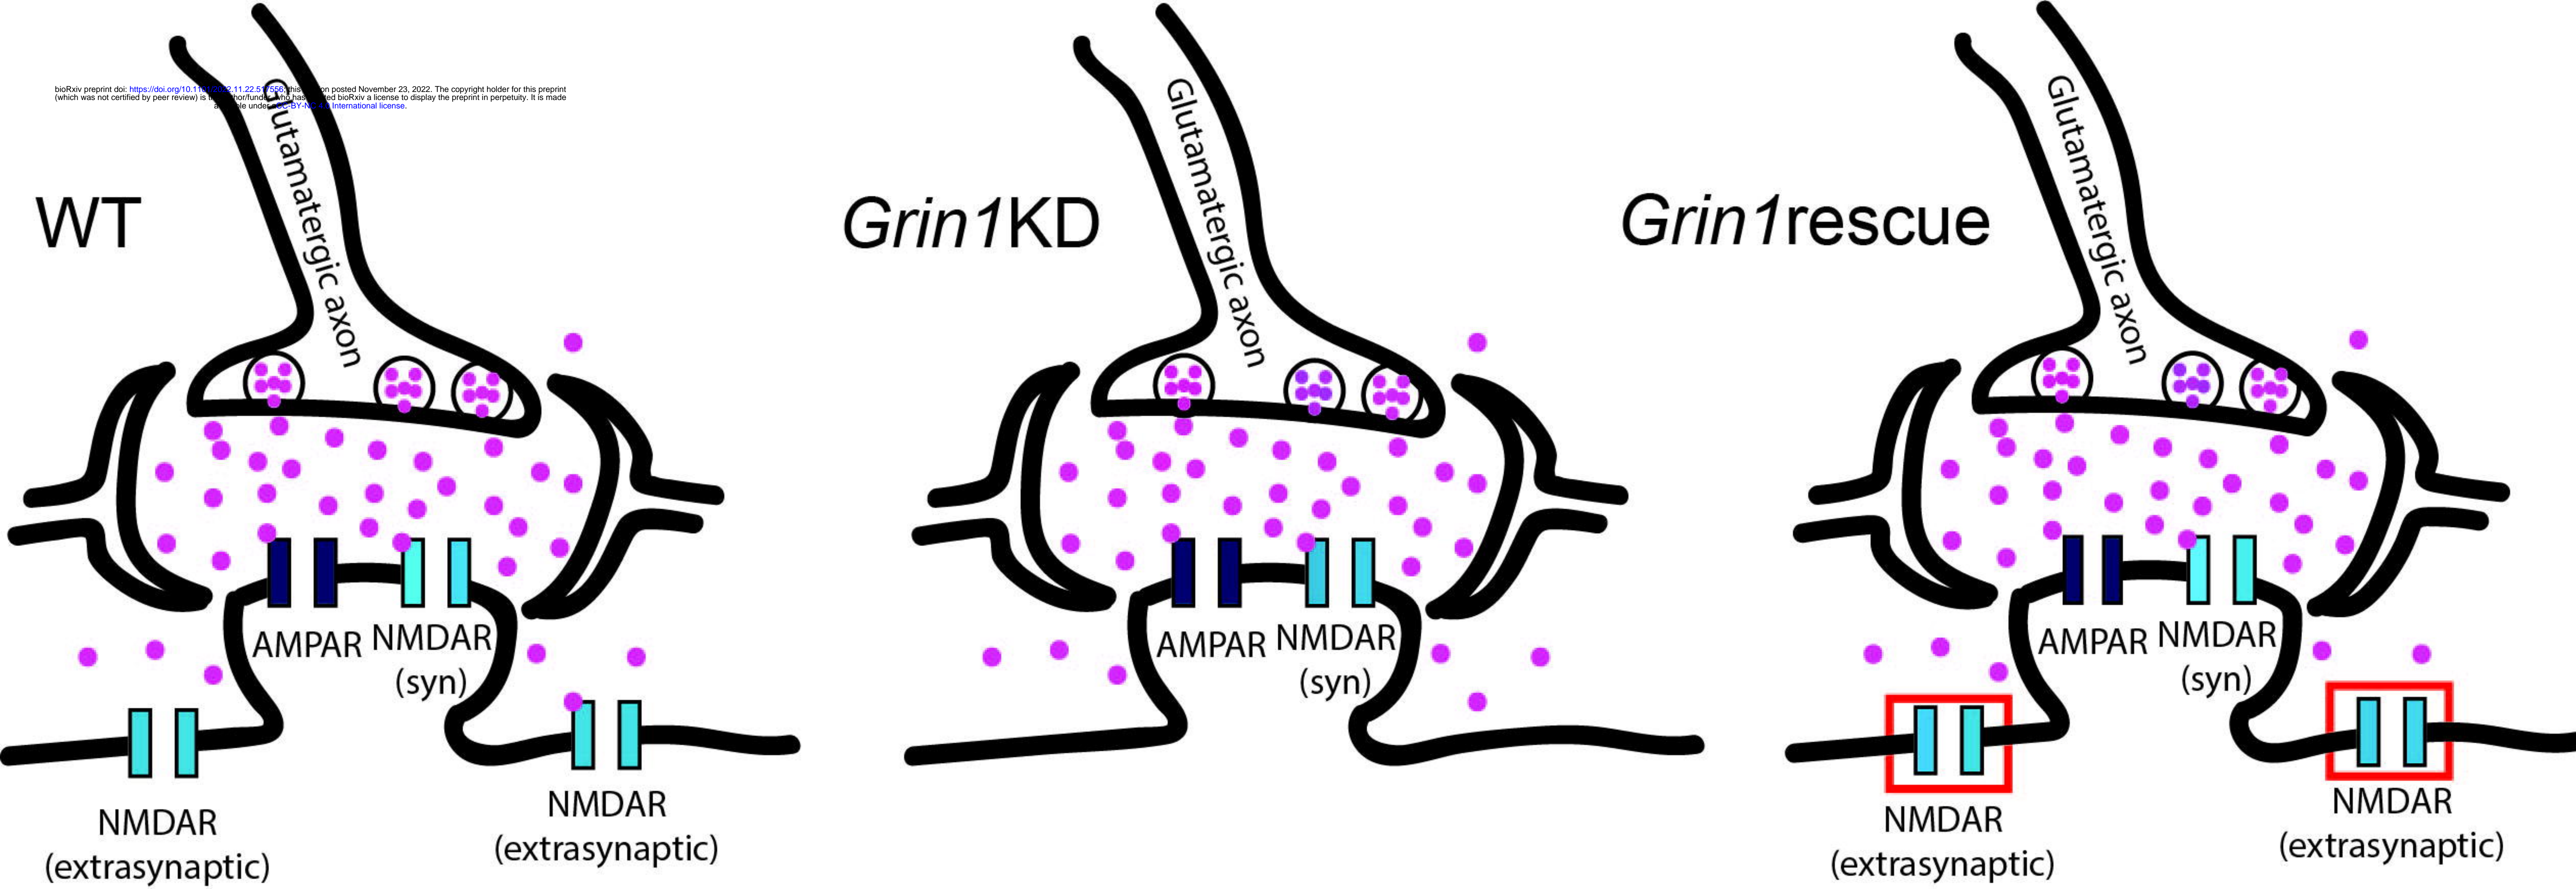

Source: https://www.biorxiv.org/content/10.1101/2022.11.22.517556v1.full.pdf
